# Supplementary material
Source: Copernicus journal article supplement (doi:10.5194/egusphere-2026-2812)
Supplement: Supplementary file 1 [file egusphere-2026-2812-supplement.pdf]

# A Bayesian Maximum Entropy Framework Using Vertical Profiles to Improve Surface Ozone Estimation From IASI+GOME2, OMI/MLS, And Cris Satellite Ozone Observations

Hantao Wang<sup>1</sup>, Marc L. Serre<sup>1</sup>, Kazuyuki Miyazaki<sup>2</sup>, Juan Cuesta<sup>3</sup>, Jerry R. Ziemke<sup>4</sup>, J. Jason West<sup>1</sup>

<sup>1</sup>Department of Environmental Sciences and Engineering, University of North Carolina at Chapel Hill, Chapel Hill, 27599, USA

<sup>2</sup>Jet Propulsion Laboratory, California Institute of Technology, Pasadena, 91125, USA

<sup>3</sup>Univ. Paris Est Créteil and Université de Paris Cité, CNRS, LISA, 94010 Créteil, France

<sup>4</sup>NASA Goddard Space Flight Center, Greenbelt, 20771, USA

*Correspondence to:* J. Jason West (jasonwest@unc.edu)

## SUPPLEMENTARY INFORMATION

### Section S1. BME Covariance model

The covariance derived from the offset removed observations can be described by the following equations. Let  $C_X$  is covariance model,  $r$  is the spatial lag in degrees.

Spatial Covariance for 0-3km column ozone:

$$C_X(r) = 81.38(0.40\exp(-3r/5) + 0.60\exp(-3r/50)) \quad (S1)$$

Spatial Covariance for surface to 0-3km column ratio:

$$C_X(r) = 0.026(0.70\exp(-3r/1) + 0.30\exp(-3r/60)) \quad (S2)$$

Spatial Covariance for tropospheric column ozone:

$$C_X(r) = 69.93(0.70\exp(-3r/10) + 0.30\exp(-3r/53)) \quad (S3)$$

Spatial Covariance for Log-transformed surface to tropospheric column ratio:

$$C_X(r) = 0.091(0.68\exp(-3r/1.8) + 0.32\exp(-3r/31)) \quad (S4)$$

### Section S2. Deseasonal trend method

To estimate the long-term trend in the BME-adjusted surface ozone estimates from OMI/MLS, this method first isolates and removes the seasonal cycles by fitting a harmonic regression model. Using the whole time period (2005–2022), we model the seasonal effect  $S(m)$ , for any given month, using a combination of 12-month and 6-month sine and cosine waves:

$$S(m) = \beta_0 + \beta_1 \sin\left(\frac{2\pi m}{12}\right) + \beta_2 \cos\left(\frac{2\pi m}{12}\right) + \beta_3 \sin\left(\frac{2\pi m}{6}\right) + \beta_4 \cos\left(\frac{2\pi m}{6}\right) \quad (S5)$$

By calculating this seasonal effect and subtracting it from the actual observed value each month, we generate a series of monthly anomalies without the seasonal effect. Once the seasonal effects are removed, we evaluate the long-term trend on those remaining

anomalies using a median quantile regression ( $\tau = 0.5$ ). Unlike standard linear regression, which tracks the mean, this approach models the conditional median of the anomalies over the time period (in this study is from 2005-2022).

**Table S1. List of ozonesonde and IAGOS locations selected for this study. Day/Month represents the average number of recording days per month.**

| Type  | Station | Record year | Longitude | Latitude | Day/Month |
|-------|---------|-------------|-----------|----------|-----------|
| IAGOS | ABV     | 2015-2022   | 7.32      | 9.06     | 5.30      |
| IAGOS | ADD     | 2012-2017   | 38.80     | 8.97     | 5.00      |
| IAGOS | ATL     | 2005-2021   | -84.42    | 33.68    | 6.40      |
| IAGOS | BKK     | 2006-2023   | 100.64    | 13.81    | 9.53      |
| IAGOS | BOM     | 2015-2023   | 72.94     | 19.12    | 5.00      |
| IAGOS | CCS     | 2005-2017   | -66.90    | 10.76    | 6.78      |
| IAGOS | COO     | 2018-2022   | 2.40      | 6.51     | 5.00      |
| IAGOS | CPT     | 2017-2020   | 18.56     | -33.96   | 4.60      |
| IAGOS | DEL     | 2005-2022   | 77.07     | 28.50    | 5.80      |
| IAGOS | DFW     | 2006-2017   | -96.98    | 33.01    | 6.28      |
| IAGOS | GIG     | 2012-2013   | -43.30    | -22.70   | 5.30      |
| IAGOS | HKG     | 2005-2023   | 113.95    | 22.15    | 10.42     |
| IAGOS | HND     | 2018-2023   | 139.88    | 35.44    | 5.67      |
| IAGOS | HYD     | 2006-2008   | 78.26     | 17.44    | 7.06      |
| IAGOS | IAH     | 2017-2017   | -95.25    | 30.00    | 4.00      |
| IAGOS | IKA     | 2013-2023   | 51.16     | 35.43    | 5.40      |
| IAGOS | JED     | 2012-2018   | 39.05     | 21.71    | 6.71      |
| IAGOS | JFK     | 2005-2023   | -73.61    | 40.59    | 4.00      |
| IAGOS | KIX     | 2005-2023   | 135.08    | 34.40    | 8.81      |
| IAGOS | KRT     | 2012-2014   | 32.64     | 15.48    | 6.13      |
| IAGOS | KUL     | 2005-2016   | 101.64    | 2.84     | 4.82      |
| IAGOS | KWI     | 2012-2022   | 48.03     | 29.35    | 5.21      |
| IAGOS | LAD     | 2009-2013   | 13.29     | -8.96    | 5.75      |
| IAGOS | LAX     | 2005-2023   | -118.38   | 33.92    | 10.47     |
| IAGOS | LFW     | 2017-2018   | 1.31      | 6.33     | 4.00      |
| IAGOS | LOS     | 2015-2023   | 3.41      | 6.59     | 4.71      |
| IAGOS | MAA     | 2012-2018   | 80.03     | 13.14    | 7.00      |
| IAGOS | MCT     | 2013-2013   | 58.04     | 23.60    | 5.00      |
| IAGOS | MEL     | 2016-2018   | 144.78    | -37.55   | 1.14      |
| IAGOS | MNL     | 2015-2023   | 120.98    | 14.53    | 5.56      |
| IAGOS | NBO     | 2019-2022   | 36.89     | -1.34    | 4.00      |
| IAGOS | NIM     | 2013-2018   | 2.13      | 13.50    | 5.00      |
| IAGOS | NKC     | 2017-2022   | -15.91    | 18.33    | 4.00      |
| IAGOS | NRT     | 2005-2023   | 140.47    | 35.76    | 9.30      |
| IAGOS | ORD     | 2006-2021   | -87.73    | 42.15    | 9.19      |
| IAGOS | OUA     | 2013-2018   | -1.33     | 12.56    | 4.75      |
| IAGOS | PHC     | 2015-2022   | 7.01      | 5.30     | 5.33      |
| IAGOS | PTY     | 2017-2020   | -79.22    | 9.15     | 4.80      |
| IAGOS | SFO     | 2005-2018   | -122.35   | 37.68    | 5.44      |
| IAGOS | SGN     | 2005-2018   | 106.62    | 10.84    | 5.53      |

|            |                  |           |         |        |       |
|------------|------------------|-----------|---------|--------|-------|
| IAGOS      | SIN              | 2012-2018 | 104.02  | 1.42   | 6.17  |
| IAGOS      | SJO              | 2014-2023 | -84.35  | 9.94   | 2.23  |
| IAGOS      | SSG              | 2015-2022 | 8.46    | 3.93   | 4.33  |
| IAGOS      | SYD              | 2016-2018 | 151.23  | -33.92 | 5.00  |
| IAGOS      | THR              | 2005-2005 | 51.31   | 35.65  | 7.13  |
| IAGOS      | TLV              | 2010-2012 | 34.66   | 32.09  | 4.67  |
| IAGOS      | TPE              | 2012-2023 | 121.11  | 25.03  | 18.71 |
| IAGOS      | WDH              | 2005-2013 | 17.48   | -22.39 | 13.49 |
| Ozonesonde | alert            | 2005-2024 | -62.30  | 82.50  | 4.69  |
| Ozonesonde | ascension        | 2005-2022 | -14.22  | -7.56  | 4.41  |
| Ozonesonde | boulder          | 2005-2023 | -105.20 | 39.95  | 4.92  |
| Ozonesonde | broadmeadows     | 2005-2024 | 144.95  | -37.69 | 4.36  |
| Ozonesonde | churchill        | 2005-2021 | -94.07  | 58.75  | 4.52  |
| Ozonesonde | costarica        | 2005-2021 | -84.21  | 9.98   | 4.66  |
| Ozonesonde | davis            | 2006-2024 | 77.97   | -68.58 | 4.30  |
| Ozonesonde | debilt           | 2005-2020 | 5.18    | 52.10  | 4.58  |
| Ozonesonde | easter island    | 2005-2015 | -109.42 | -27.17 | 4.08  |
| Ozonesonde | edmonton         | 2005-2021 | -114.10 | 53.54  | 4.50  |
| Ozonesonde | eureka           | 2005-2020 | -86.42  | 80.05  | 6.08  |
| Ozonesonde | fiji             | 2008-2015 | 178.45  | -18.15 | 4.00  |
| Ozonesonde | goosebay         | 2005-2021 | -60.30  | 53.32  | 4.72  |
| Ozonesonde | hanoi            | 2006-2018 | 105.80  | 21.02  | 6.33  |
| Ozonesonde | hilo             | 2005-2023 | -155.05 | 19.72  | 4.31  |
| Ozonesonde | hohenpeissenberg | 2005-2023 | 11.00   | 47.80  | 10.62 |
| Ozonesonde | izana            | 2005-2022 | -16.26  | 28.46  | 4.34  |
| Ozonesonde | kelowna          | 2005-2017 | -119.40 | 49.93  | 5.18  |
| Ozonesonde | kualalumpur      | 2005-2016 | 101.70  | 2.73   | 1.94  |
| Ozonesonde | laquila          | 2018-2020 | 13.31   | 42.38  | 5.00  |
| Ozonesonde | lauder           | 2005-2023 | 169.68  | -45.04 | 4.61  |
| Ozonesonde | legionowo        | 2005-2022 | 20.97   | 52.40  | 4.70  |
| Ozonesonde | lerwick          | 2005-2022 | -1.19   | 60.14  | 4.40  |
| Ozonesonde | lindenberg       | 2014-2024 | 14.12   | 52.21  | 4.84  |
| Ozonesonde | macquarie island | 2005-2024 | 158.94  | -54.50 | 4.34  |
| Ozonesonde | madrid           | 2005-2022 | -3.58   | 40.47  | 4.32  |
| Ozonesonde | naha             | 2009-2018 | 127.69  | 26.21  | 4.19  |
| Ozonesonde | nyalesund        | 2005-2022 | 11.95   | 78.93  | 6.64  |
| Ozonesonde | ohp              | 2005-2023 | 5.71    | 43.94  | 4.40  |
| Ozonesonde | paramaribo       | 2005-2021 | -55.21  | 5.81   | 4.28  |
| Ozonesonde | payerne          | 2005-2022 | 6.94    | 46.81  | 12.70 |
| Ozonesonde | resolute         | 2005-2021 | -94.98  | 74.72  | 5.12  |
| Ozonesonde | reunion          | 2005-2022 | 55.50   | -21.10 | 4.20  |
| Ozonesonde | samoa            | 2005-2023 | -170.71 | -14.33 | 4.22  |
| Ozonesonde | sancristobal     | 2005-2022 | -89.60  | -0.92  | 4.42  |
| Ozonesonde | sapporo          | 2010-2018 | 141.33  | 43.06  | 4.22  |
| Ozonesonde | scoresbysund     | 2005-2020 | -21.95  | 70.48  | 4.67  |
| Ozonesonde | sodankyla        | 2005-2021 | 26.62   | 67.36  | 4.87  |

|            |              |           |         |        |       |
|------------|--------------|-----------|---------|--------|-------|
| Ozonesonde | trinidadhead | 2005-2023 | -124.15 | 41.06  | 5.05  |
| Ozonesonde | ucclle       | 2005-2022 | 4.21    | 50.48  | 11.84 |
| Ozonesonde | ushuaia      | 2008-2024 | -68.31  | -54.85 | 4.70  |
| Ozonesonde | valentia     | 2006-2022 | -10.25  | 51.93  | 4.35  |
| Ozonesonde | wallops      | 2005-2020 | -75.70  | 37.90  | 4.59  |
| Ozonesonde | yarmouth     | 2005-2021 | -66.11  | 43.87  | 4.84  |

**Table S2. Satellite observations used for ozone assimilation in TCR-2. Table based on Miyazaki et al. (2020)**

| Species                           | Instrument          | Period    | Data typea                                        | Reference                                                                           |
|-----------------------------------|---------------------|-----------|---------------------------------------------------|-------------------------------------------------------------------------------------|
| NO <sub>2</sub> , SO <sub>2</sub> | OMI (Aura)          | 2005-2020 | TrC for NO <sub>2</sub> , PBL for SO <sub>2</sub> | (Boersma et al., 2011; Boersma et al., 2017; Krotkov et al., 2016; Li et al., 2013) |
| NO <sub>2</sub>                   | SCIAMACHY (Envisat) | 2005-2012 | TrC                                               | (Boersma et al., 2004)                                                              |
| NO <sub>2</sub>                   | GOME-2 (Metop-A)    | 2007-2020 | TrC                                               |                                                                                     |
| Ozone                             | TES (Aura)          | 2005-2011 | PROF                                              | (Bowman et al., 2006; Herman and Kulawik, 2013)                                     |
| Ozone, HNO <sub>3</sub>           | MLS (Aura)          | 2005-2020 | PROF                                              | (Livesey et al., 2017)                                                              |
| CO                                | MOPITT (Terra)      | 2005-2020 | PROF                                              | (Deeter et al., 2017; Deeter et al., 2013)                                          |

<sup>a</sup>Satellite retrievals of atmospheric composition that were assimilated in the chemistry reanalysis. TC is total column, TRC is tropospheric column, PROF is profiles, PC is partial columns. PBL is planetary boundary layer.

**Table S3. The regions defined by Hemispheric Transport Air Pollution(HTAP)2 (Koffi et al., 2016)**

|    | Tier 1      |                                                      | Tier 2                                                                                                                                                                                           |
|----|-------------|------------------------------------------------------|--------------------------------------------------------------------------------------------------------------------------------------------------------------------------------------------------|
| 01 | <b>GLO*</b> | World                                                |                                                                                                                                                                                                  |
| 02 | OCN         | Non-arctic/Antarctic Ocean                           | 020 Baltic Sea<br>021 North Atlantic<br>022 South Atlantic<br>023 North Pacific<br>024 South Pacific<br>025 Indian Ocean<br>026 Hudson Bay<br>027 Mediterranean Sea<br>028 Black and Caspian Sea |
| 03 | <b>NAM*</b> | US+Canada (upto 66 N; polar circle)                  | 031 NE US (all divided on state or provincial lines)<br>032 SE US<br>033 NW US<br>034 SW US<br>035 E. Canada<br>036 W. Canada + Alaska up to 66 N.                                               |
| 04 | <b>EUR*</b> | Western + Eastern EU+Turkey (upto 66 N polar circle) | 041 NW Europe<br>042 SW Europe (France follows provinces level at ca. 46 N).<br>043 Eastern Europe<br>044 Greece+Turkey+Cyprus                                                                   |

|    |             |                                                                  |                                                                                                                                                                                                                                                                                                                                                                                                                                                                                                                                                           |
|----|-------------|------------------------------------------------------------------|-----------------------------------------------------------------------------------------------------------------------------------------------------------------------------------------------------------------------------------------------------------------------------------------------------------------------------------------------------------------------------------------------------------------------------------------------------------------------------------------------------------------------------------------------------------|
| 05 | <b>SAS*</b> | South Asia: India, Pakistan, Nepal, Bangladesh, Sri Lanka        | 051 North India+Pakistan+Nepal+Bangladesh<br>052 South India+Sri Lanka<br>053 Indian Himalaya (above an elevation of 1500 m)                                                                                                                                                                                                                                                                                                                                                                                                                              |
| 06 | <b>EAS*</b> | E Asia: China, Korea, Japan                                      | 061 North East China<br>062 South East China<br>063 West China +Mongolia (excl. Himalaya)<br>064 North/South Korea<br>065 Japan<br>066 China/Tibet Himalaya (above an elevation of 1500 m)                                                                                                                                                                                                                                                                                                                                                                |
| 07 | <b>SEA*</b> | South East Asia                                                  | 071 Indonesia+Malaysia+Singapore<br>072 Thailand+Myanmar+Vietnam                                                                                                                                                                                                                                                                                                                                                                                                                                                                                          |
| 08 | PAN         | Pacific, Australia+ New Zealand                                  | 081 Pacific<br>082 Australia<br>083 New Zealand                                                                                                                                                                                                                                                                                                                                                                                                                                                                                                           |
| 09 | NAF         | Northern Africa                                                  | 091 Egypt<br>092 Rest of Northern Africa                                                                                                                                                                                                                                                                                                                                                                                                                                                                                                                  |
| 10 | <b>SAF*</b> | Sub Saharan Africa                                               | 101 West and Central Africa: Côte d'Ivoire, Angola, Benin, Burkina Faso, Cameroon, Cape Verde, Chad, Congo Brazzaville, Democratic Republic of Congo, Equatorial Guinea, Gambia, Ghana, Guinea, Guinea Bissau, Liberia, Mali, Niger, Nigeria, Senegal, Sierra Leone and Togo<br>102 East Africa: Burundi, Djibouti, Eritrea, Ethiopia, Kenya, Sudan, Rwanda, Uganda, Somalia and Tanzania.<br>103 Southern Africa: Angola, Botswana, Lesotho, Madagascar, Malawi, Mauritius, Mozambique, Namibia, South Africa, Swaziland, Tanzania, Zambia, and Zimbabwe |
| 11 | <b>MDE*</b> | Middle East; S. Arabia etc, Iran, Iraq                           | 111 Middle East<br>112 S.Arabia; Yemen; Oman; etc<br>113 Iran, Iraq                                                                                                                                                                                                                                                                                                                                                                                                                                                                                       |
| 12 | MCA         | Mexico, Central America, Caribbean, Guyanas, Venezuela, Columbia | 121 Mexico<br>122 Central America<br>123 Caribbean<br>124 Guyanas, Columbia, Venezuela                                                                                                                                                                                                                                                                                                                                                                                                                                                                    |
| 13 | SAM         | S. America                                                       | 131 South Brazil<br>132 Rest of Brazil<br>133 Uruguay, Paraguay, Argentina, Chile<br>134 Peru, Ecuador                                                                                                                                                                                                                                                                                                                                                                                                                                                    |
| 14 | RBU         | Russia, Belarussia, Ukraine, Central Asia                        | 141 Russia West<br>142 Russia East<br>143 Belarussia+Ukraine                                                                                                                                                                                                                                                                                                                                                                                                                                                                                              |
| 15 | CAS         | Central Asia                                                     | 144 Uzbekistan, Kazakhstan, Kyrgyzstan, Tajikistan, Turkmenistan                                                                                                                                                                                                                                                                                                                                                                                                                                                                                          |
| 16 | NPO         | Arctic Circle (North of 66 N)+Greenland                          | 150 Arctic (includes ocean and all of Greenland)                                                                                                                                                                                                                                                                                                                                                                                                                                                                                                          |
| 17 | SPO         | Antarctic                                                        | 160 Antarctic<br>161 Southern Ocean, south of 60S                                                                                                                                                                                                                                                                                                                                                                                                                                                                                                         |

\*Regions in bold characters defined as priority regions in this paper.

**Figure S1. Spatial distribution of Ozone sonde and IAGOS locations (left), and TOAR-II locations (right). The color scale indicates the distance to the nearest vertical profile site.**

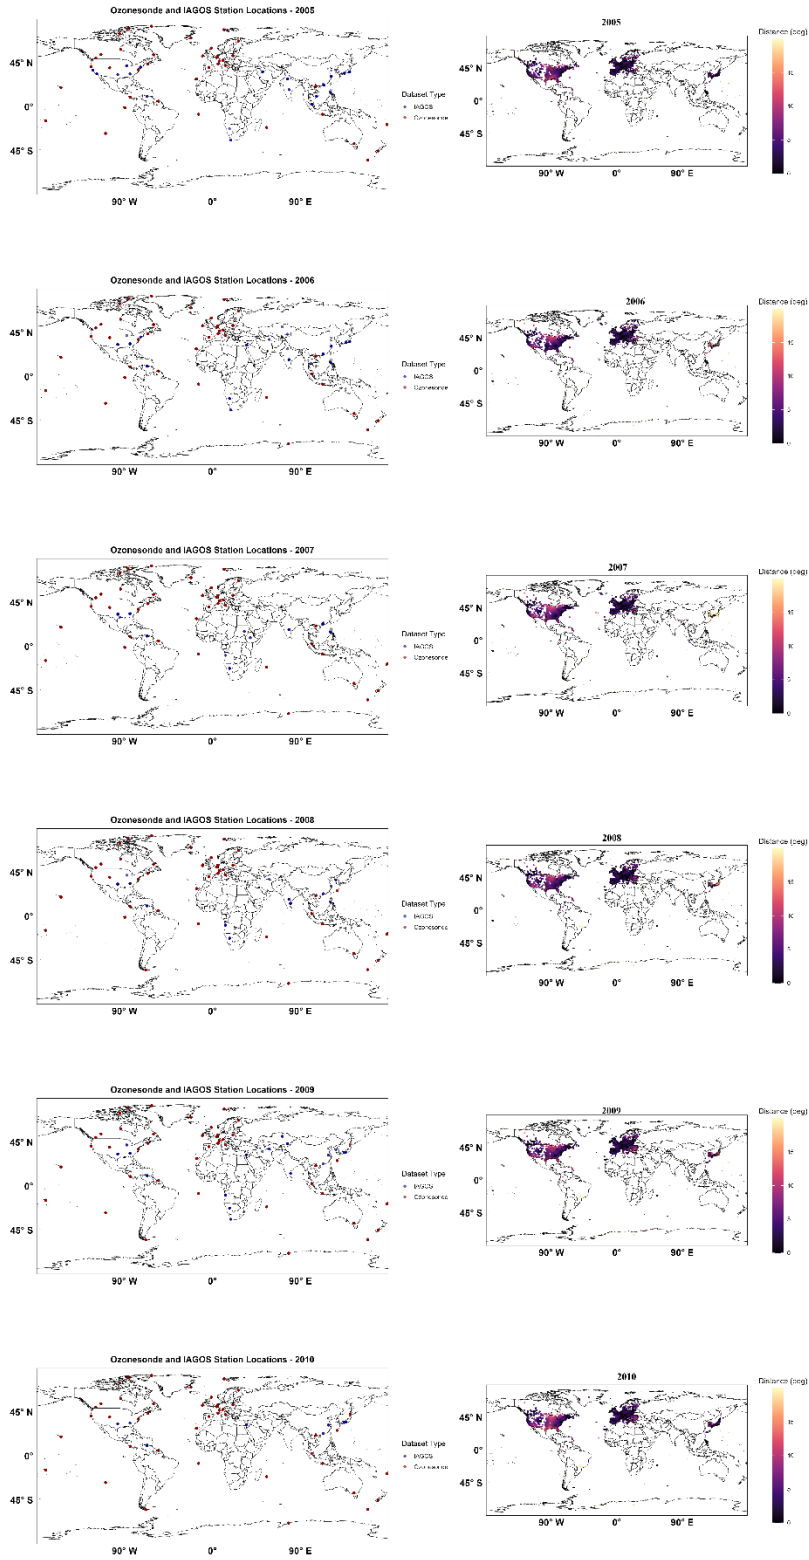

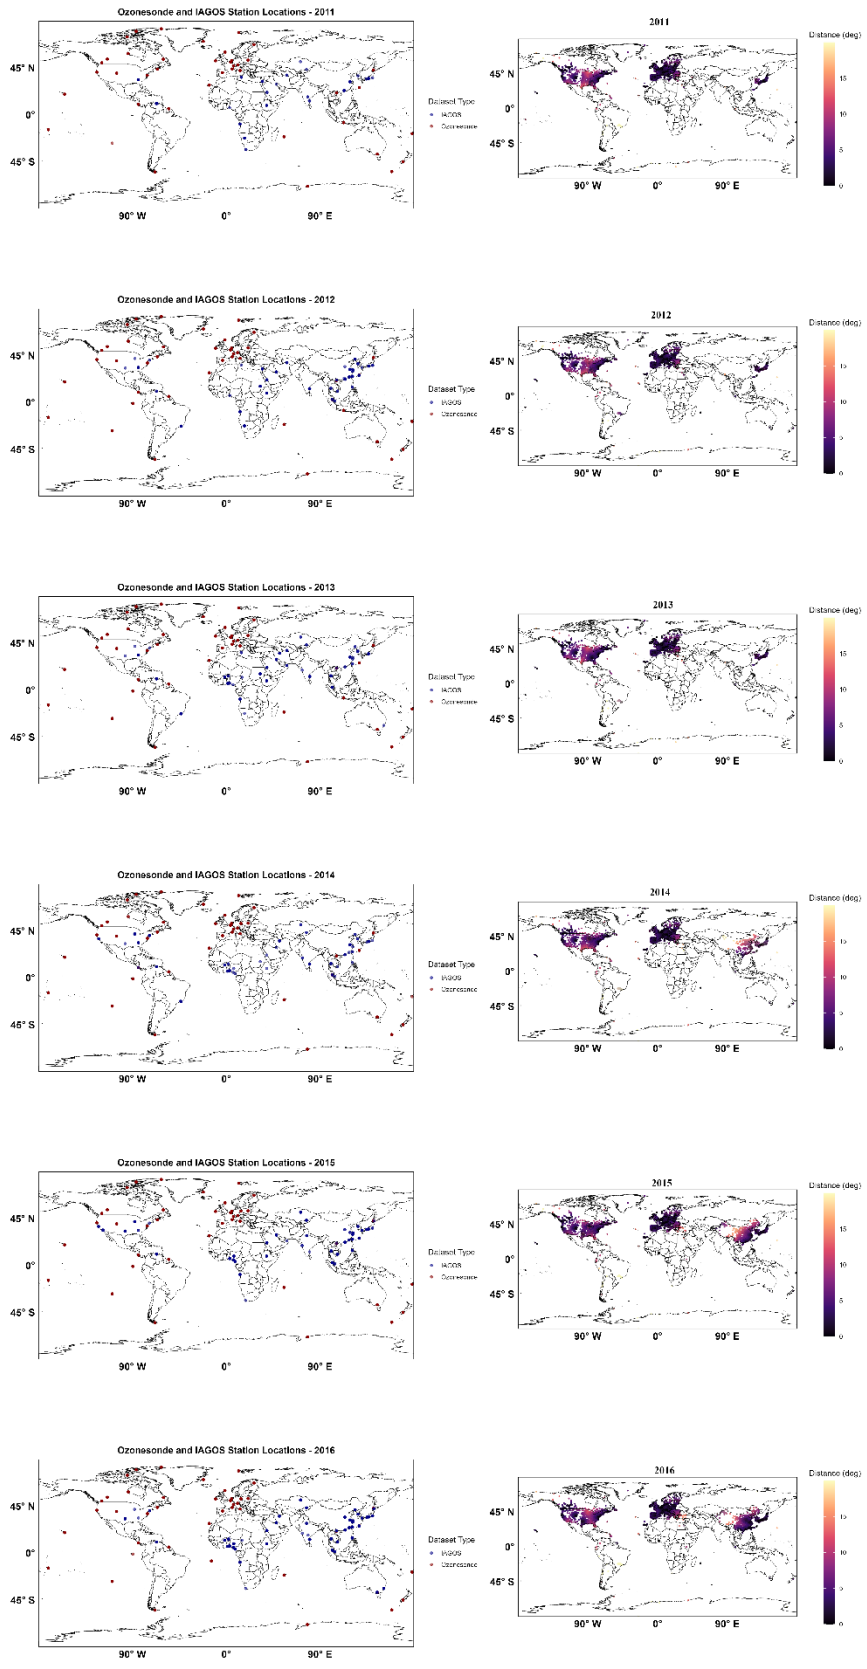

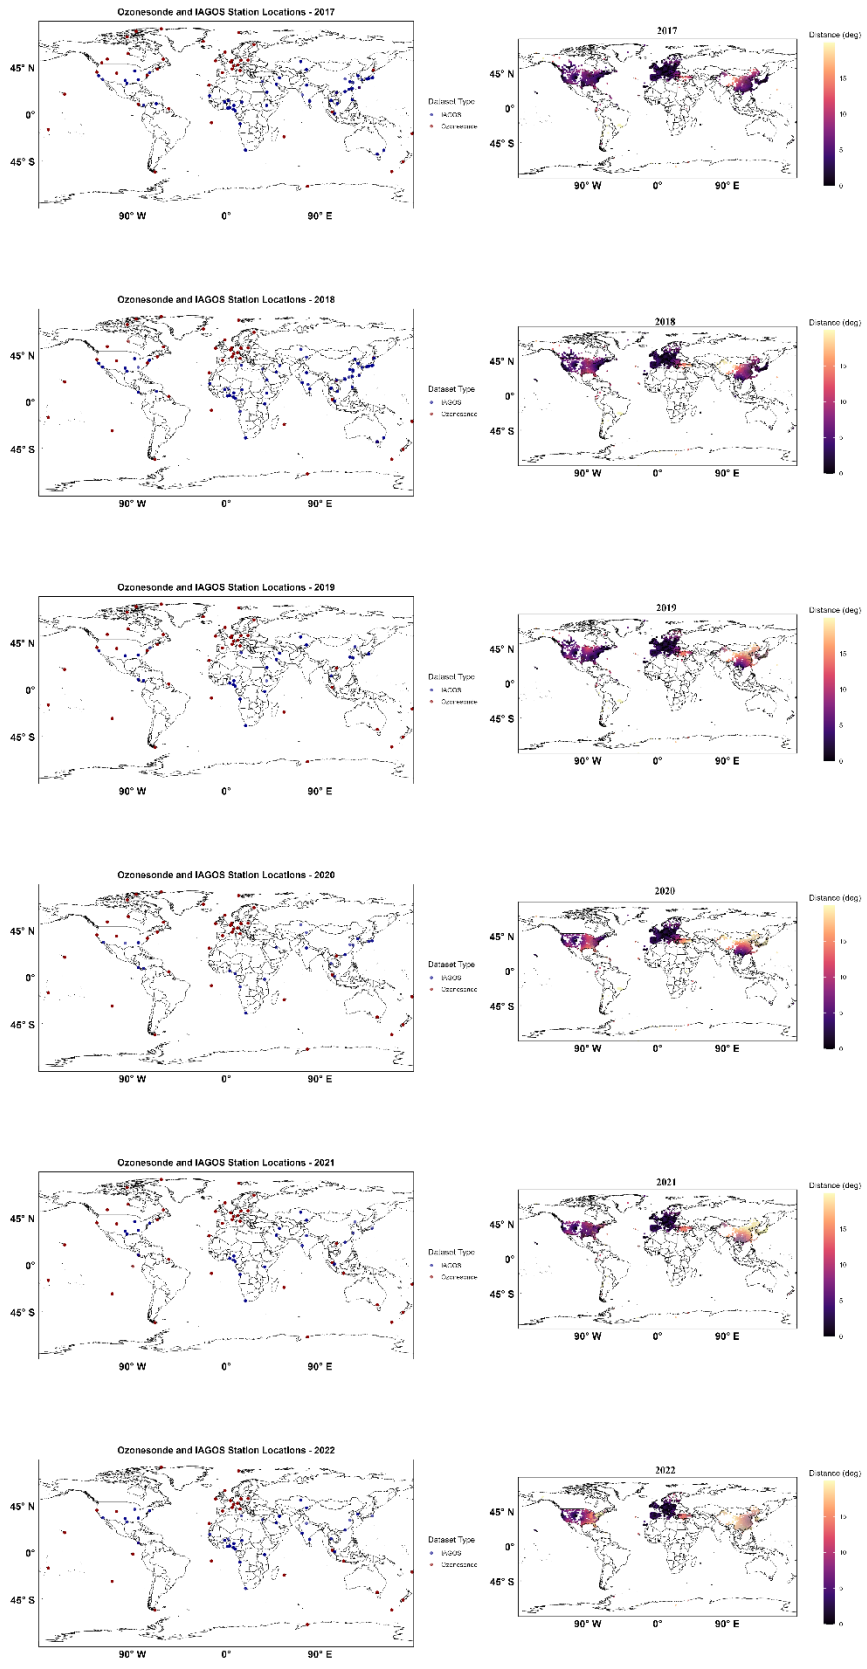

**Figure S2. Time series of monthly ozone vertical profiles. The red line represents the aggregate monthly mean derived from daily records, while the blue line represents the monthly values fitted using a GAM.**

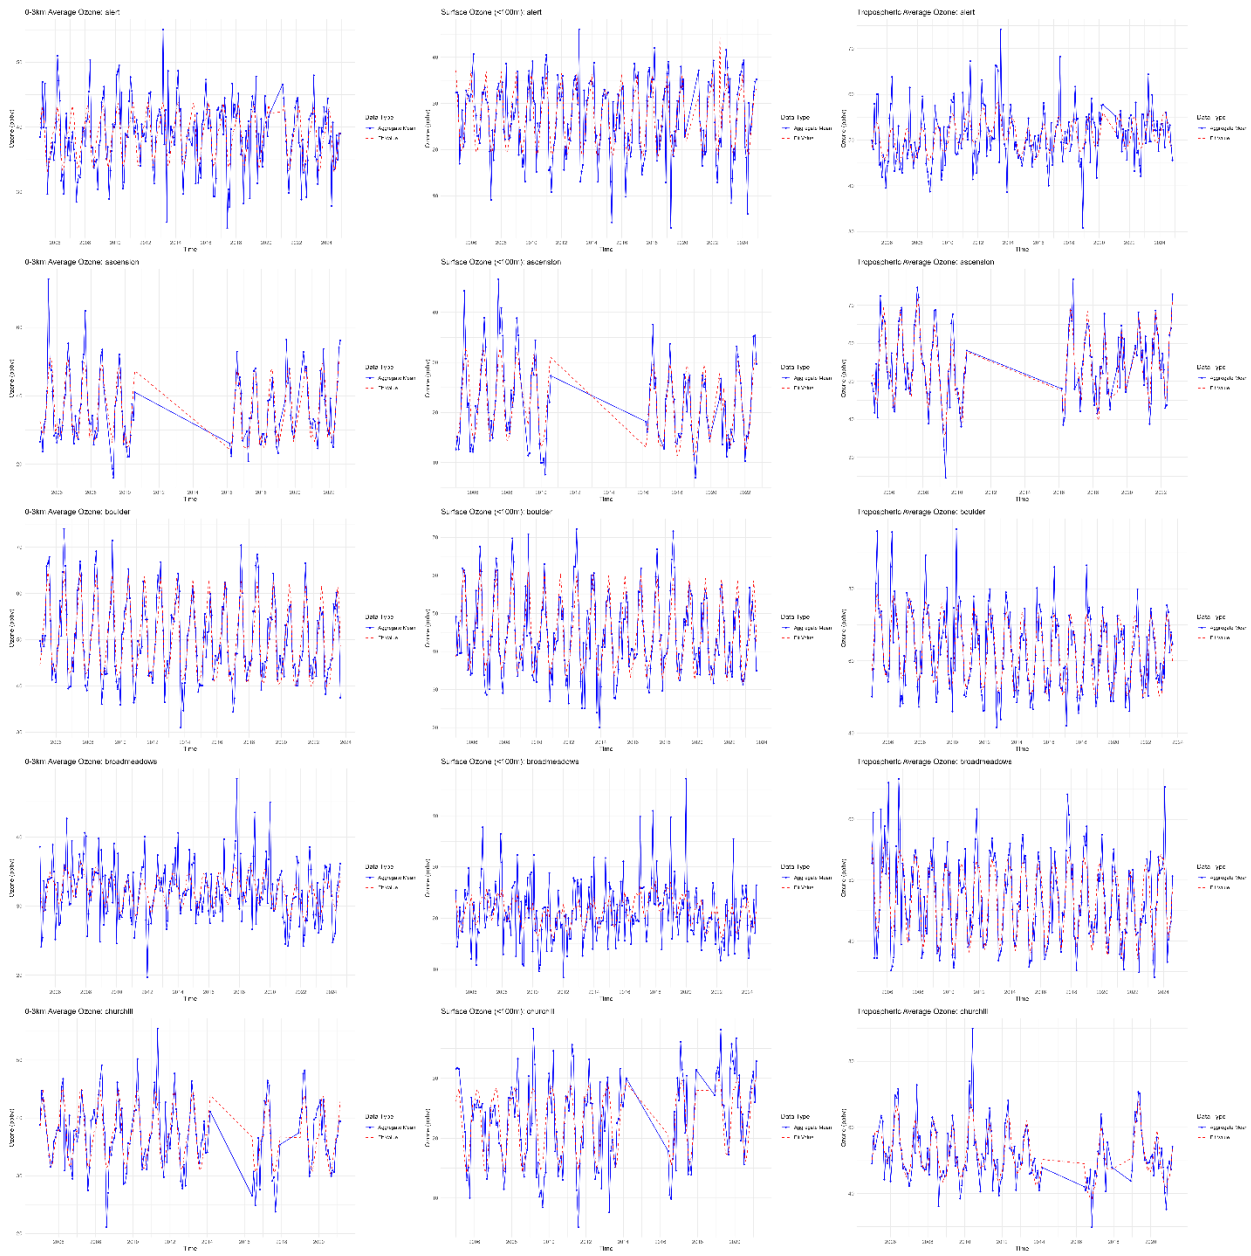

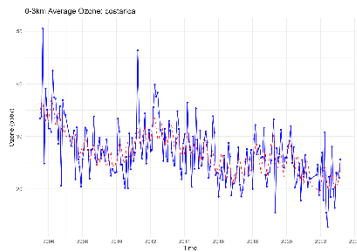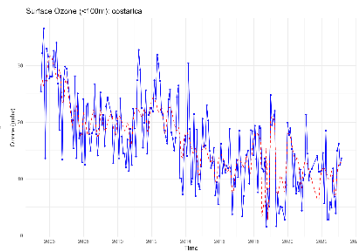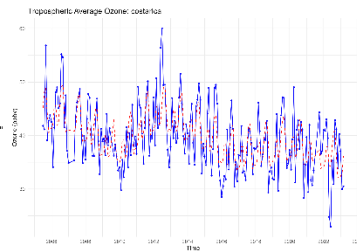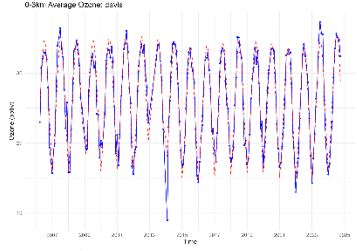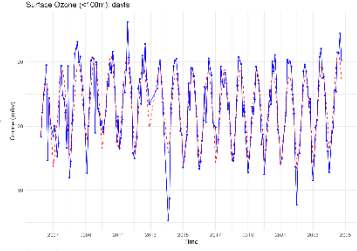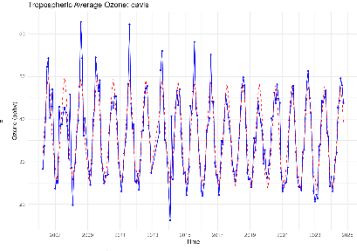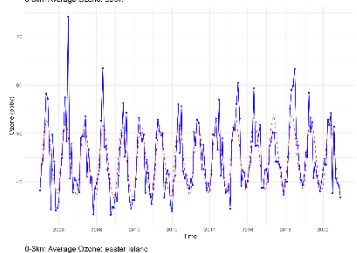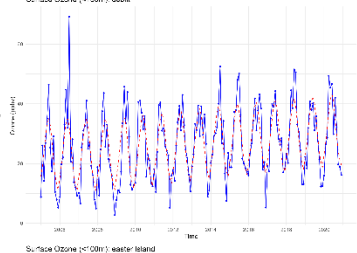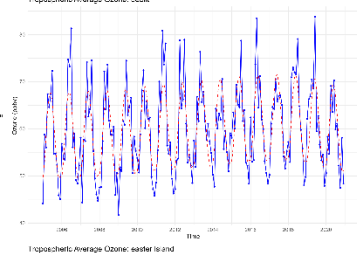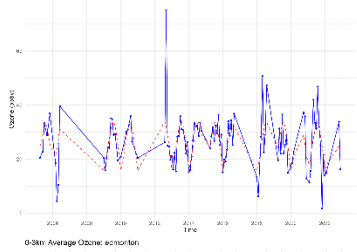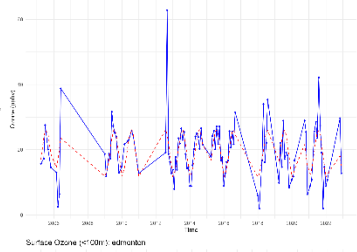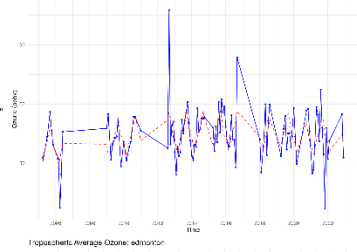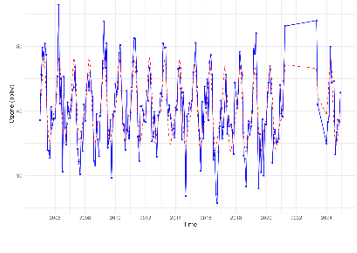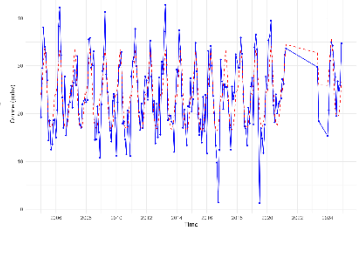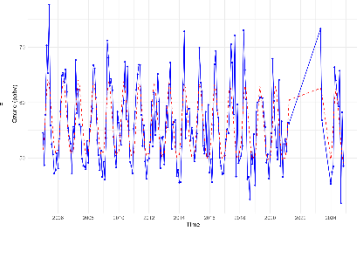

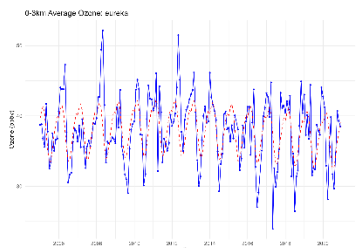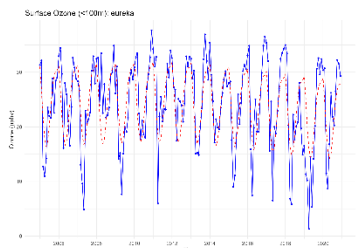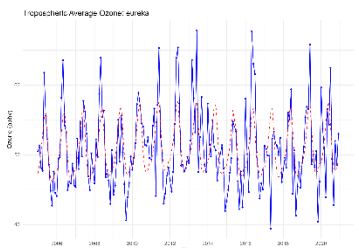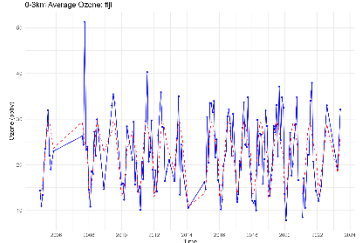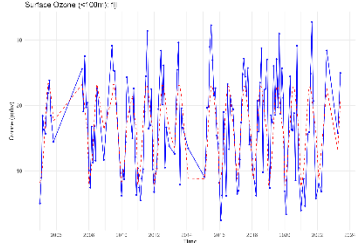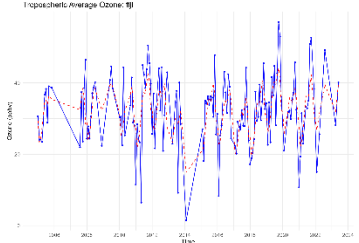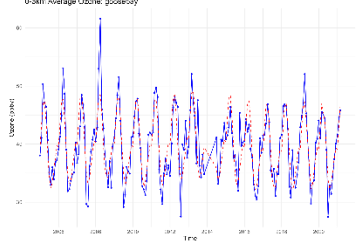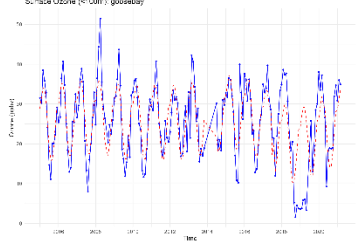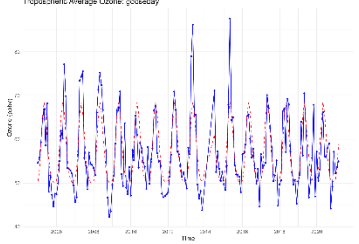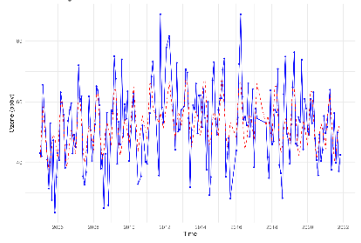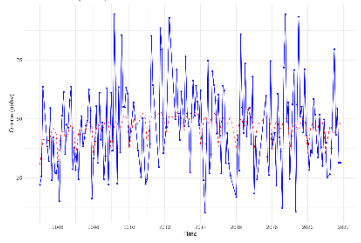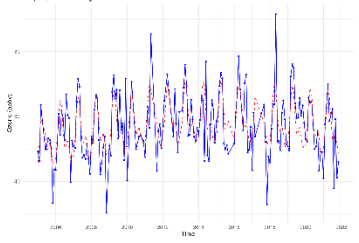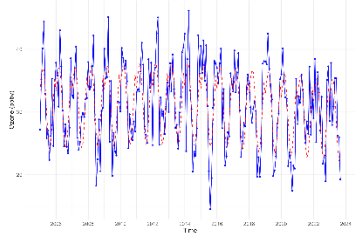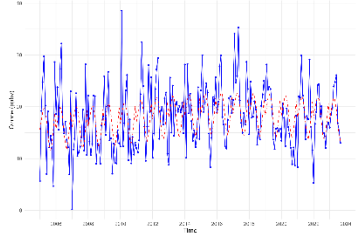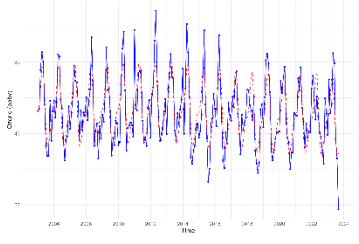

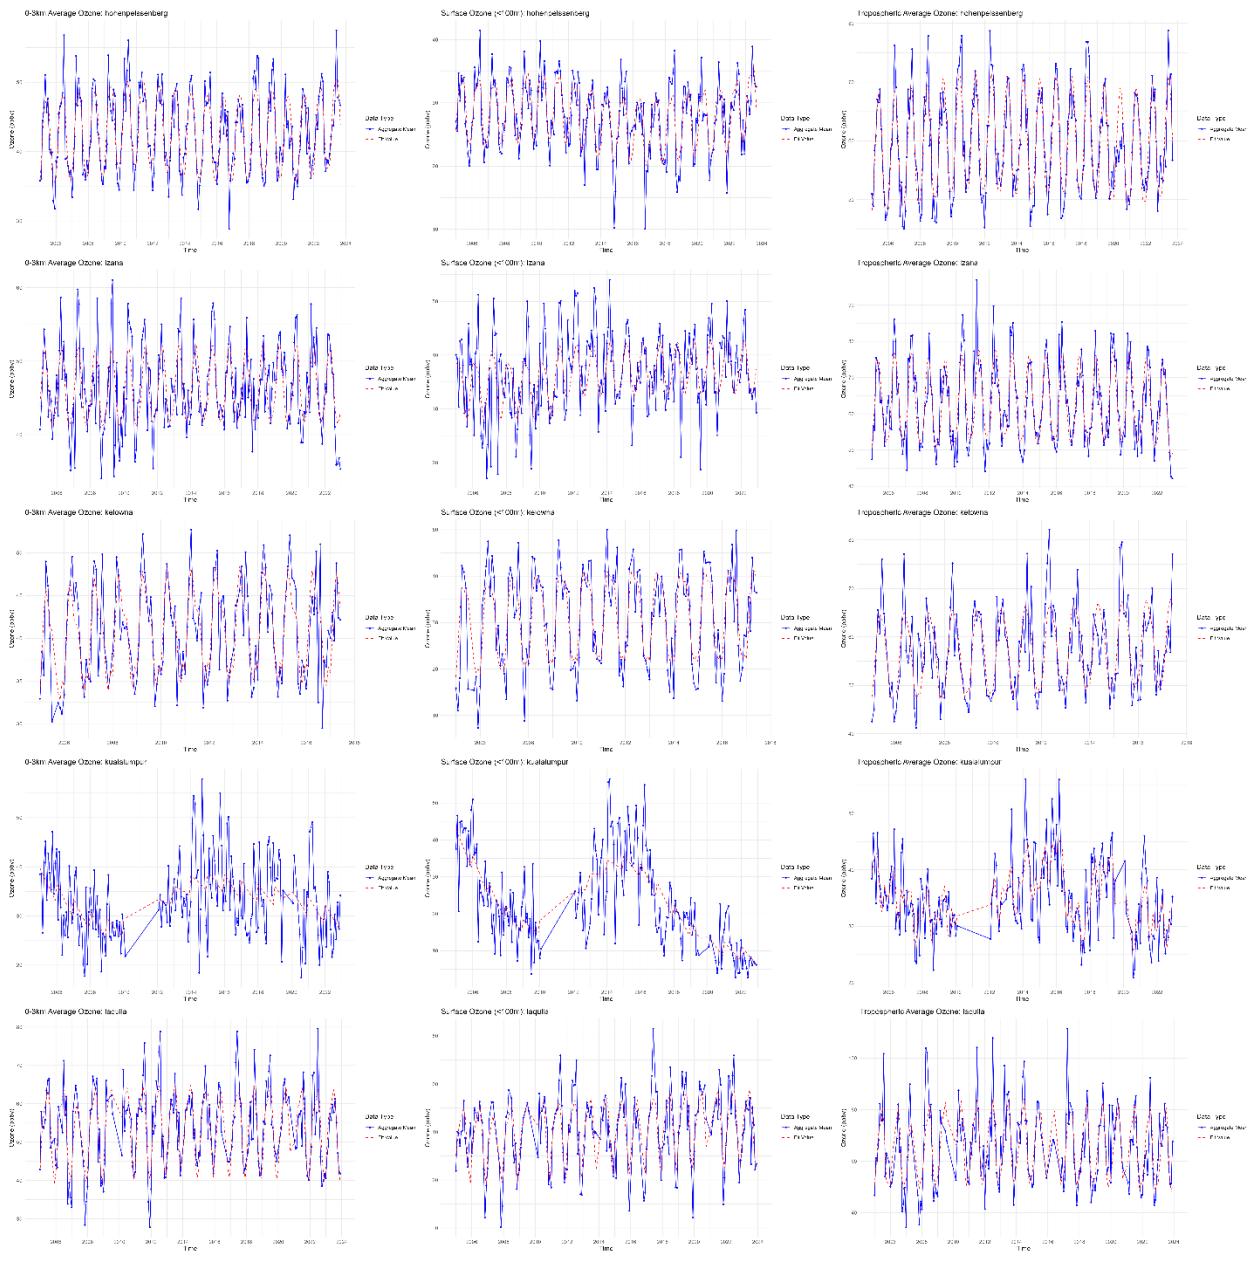

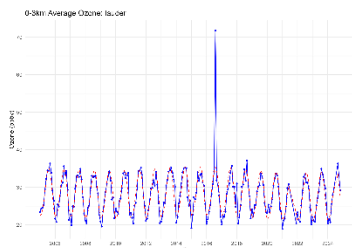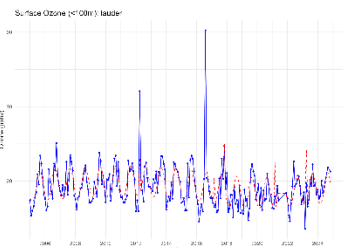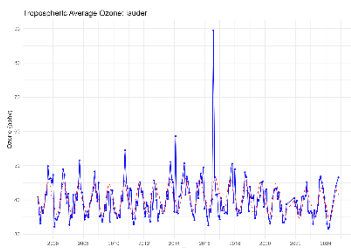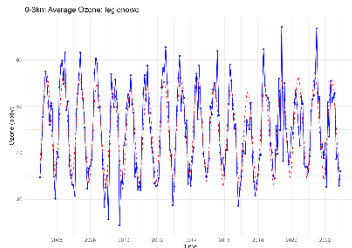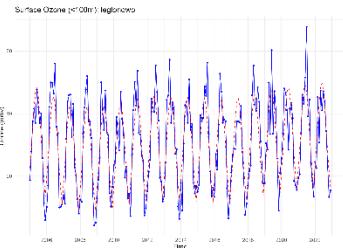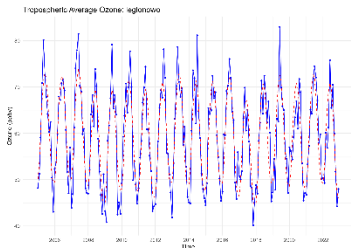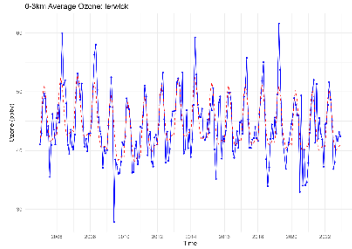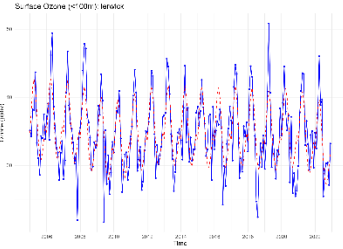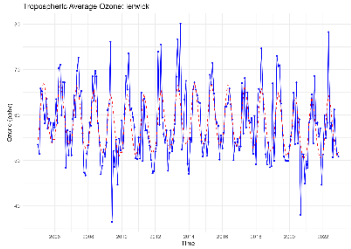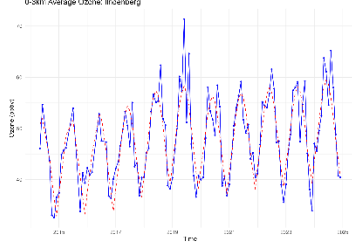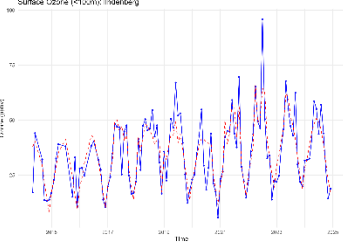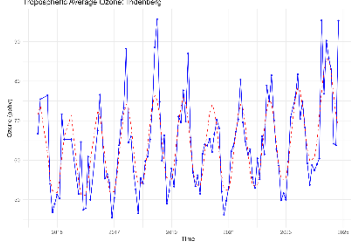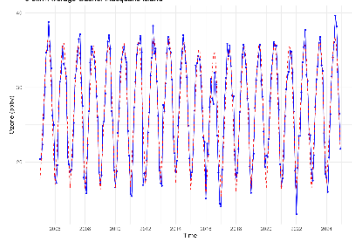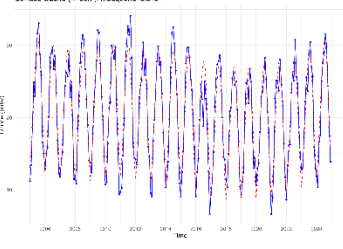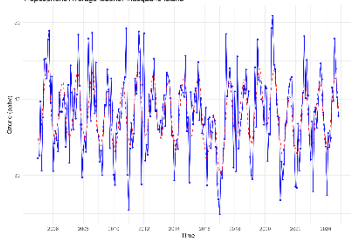

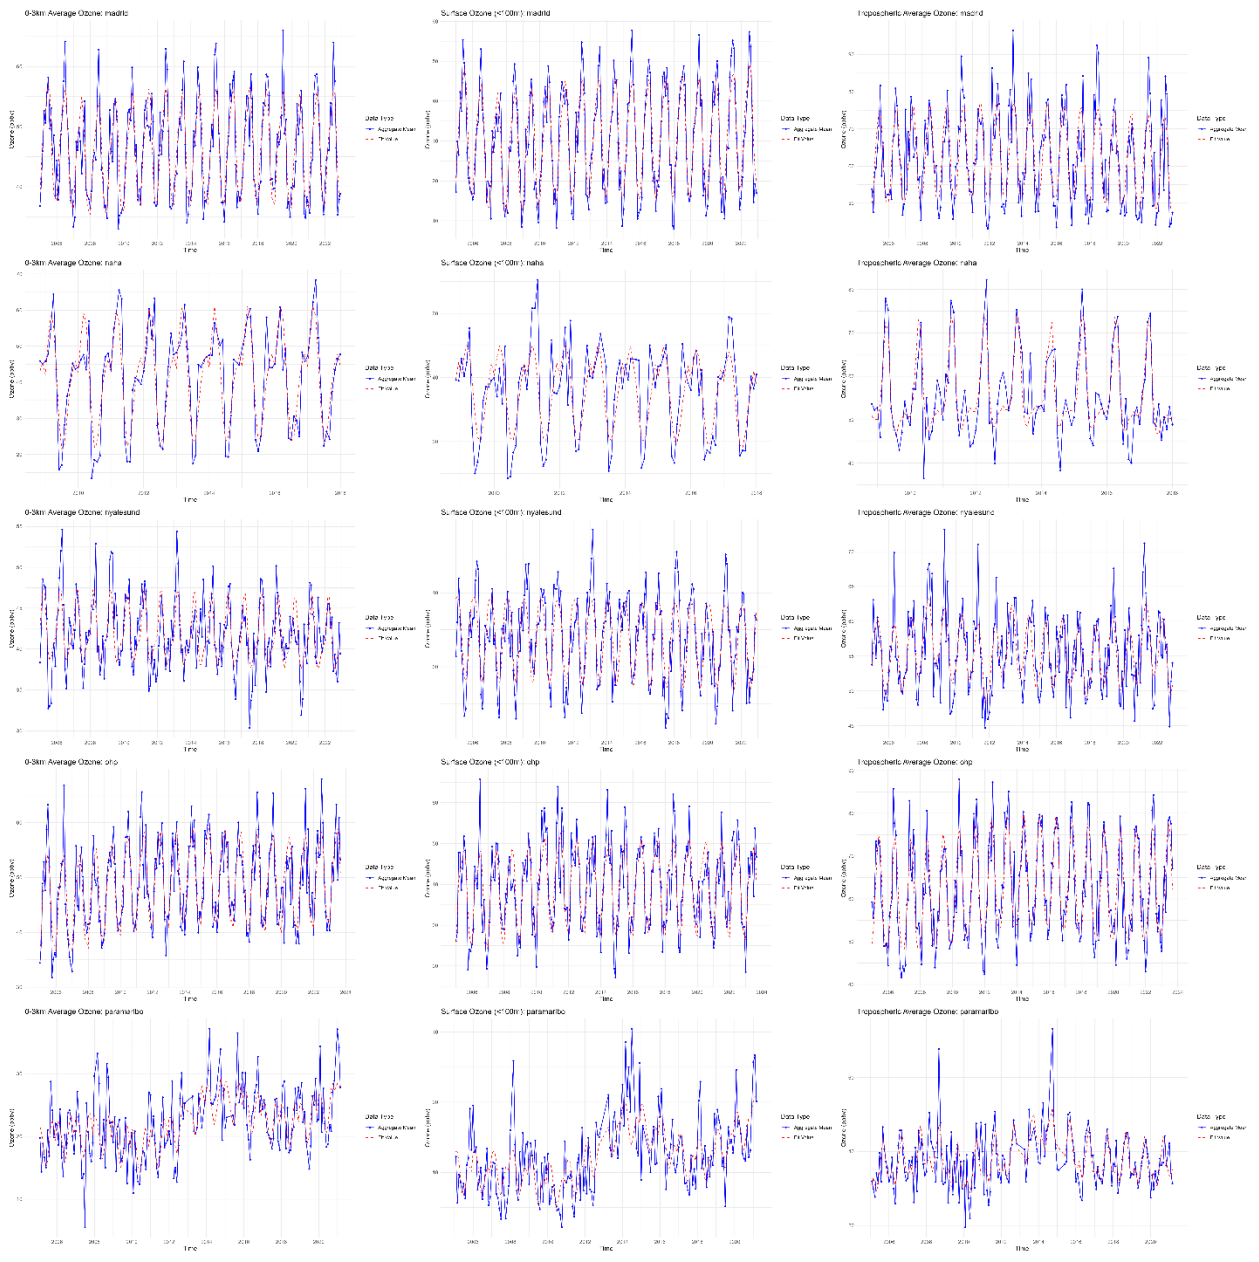

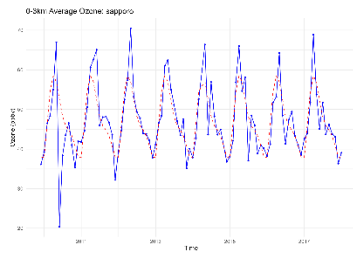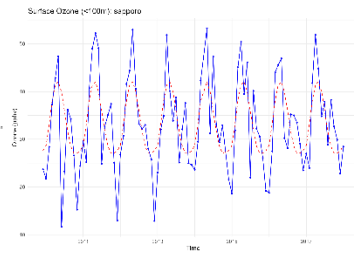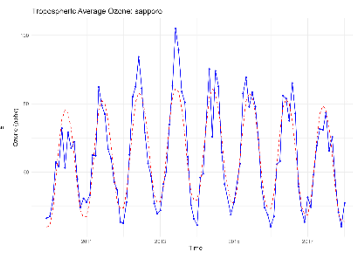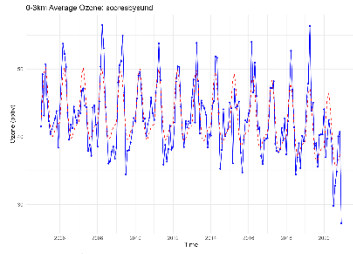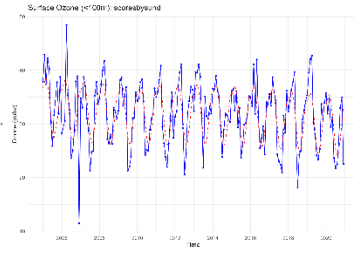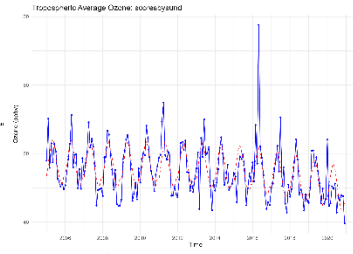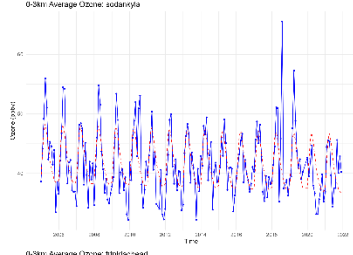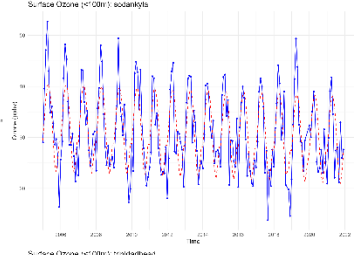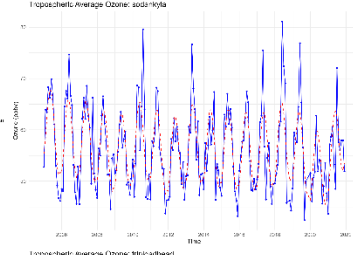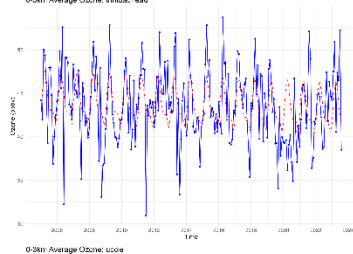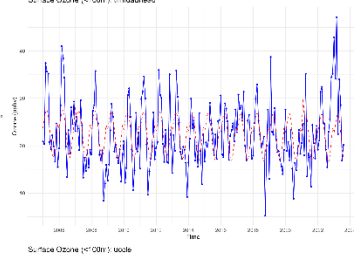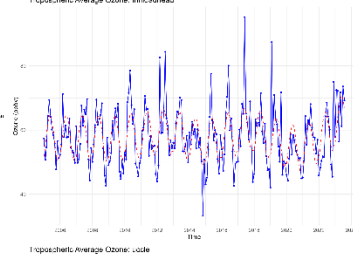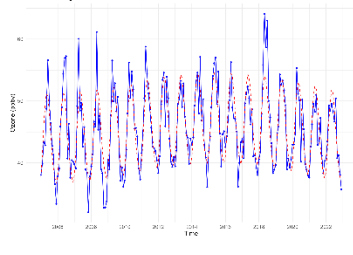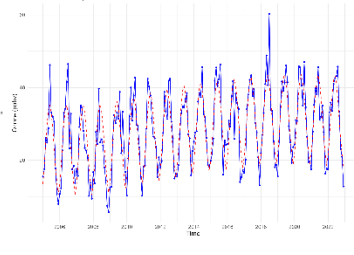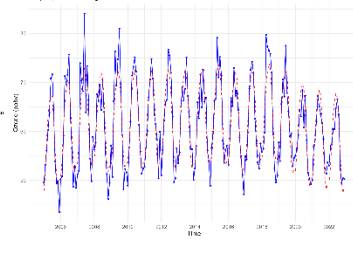

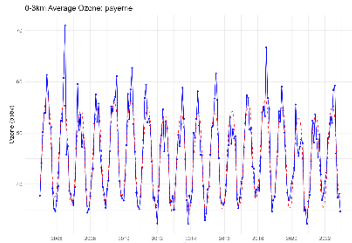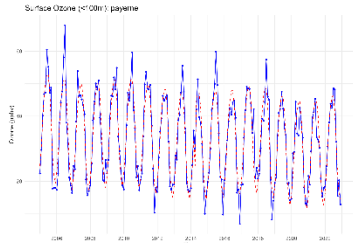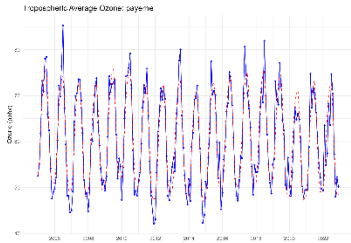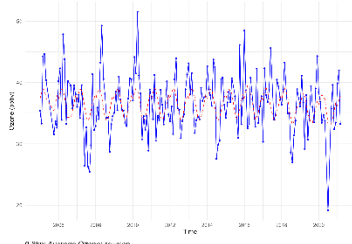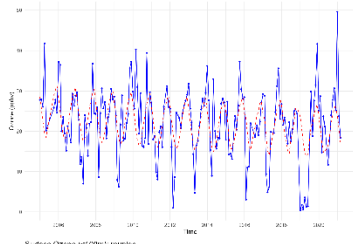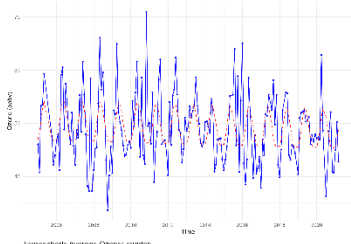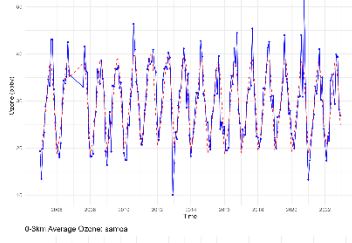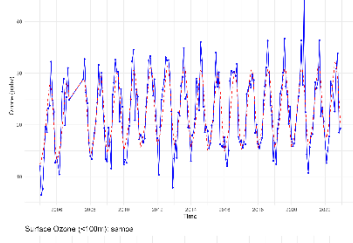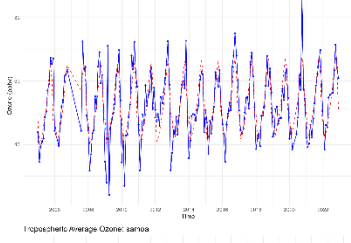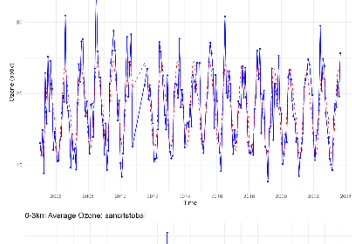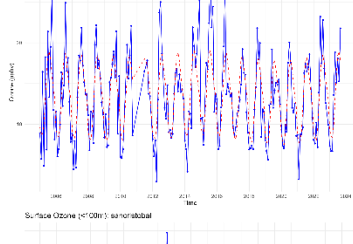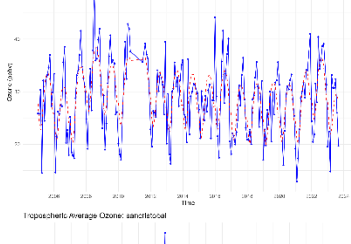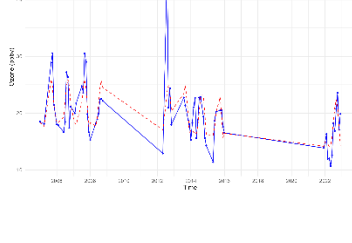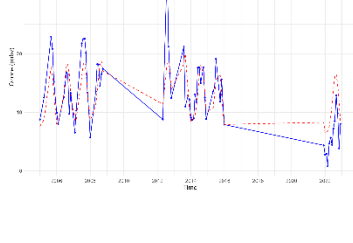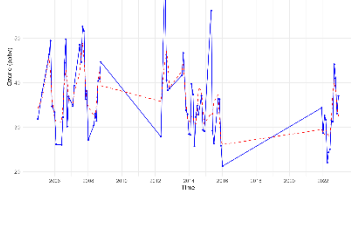

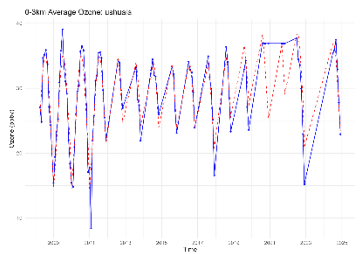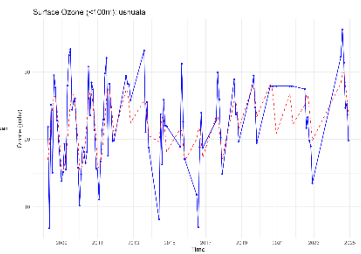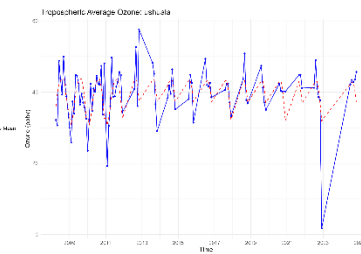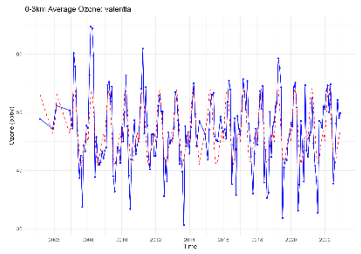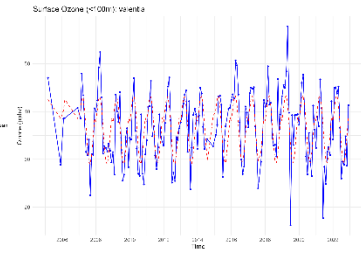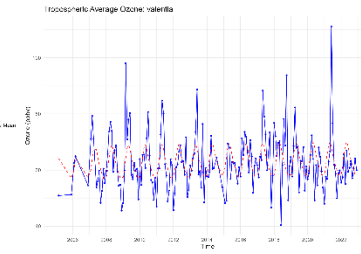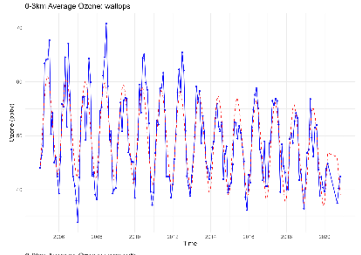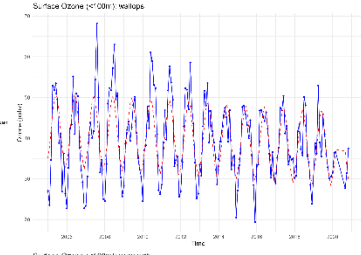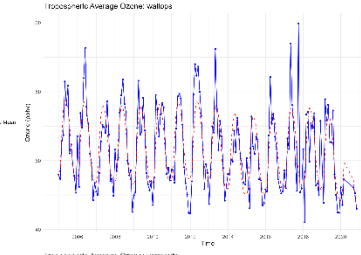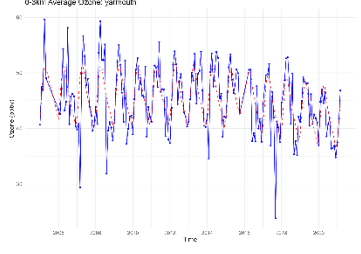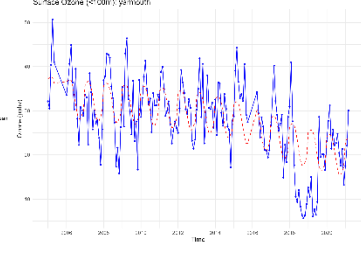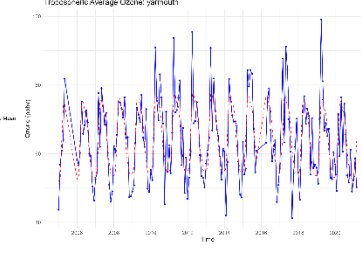

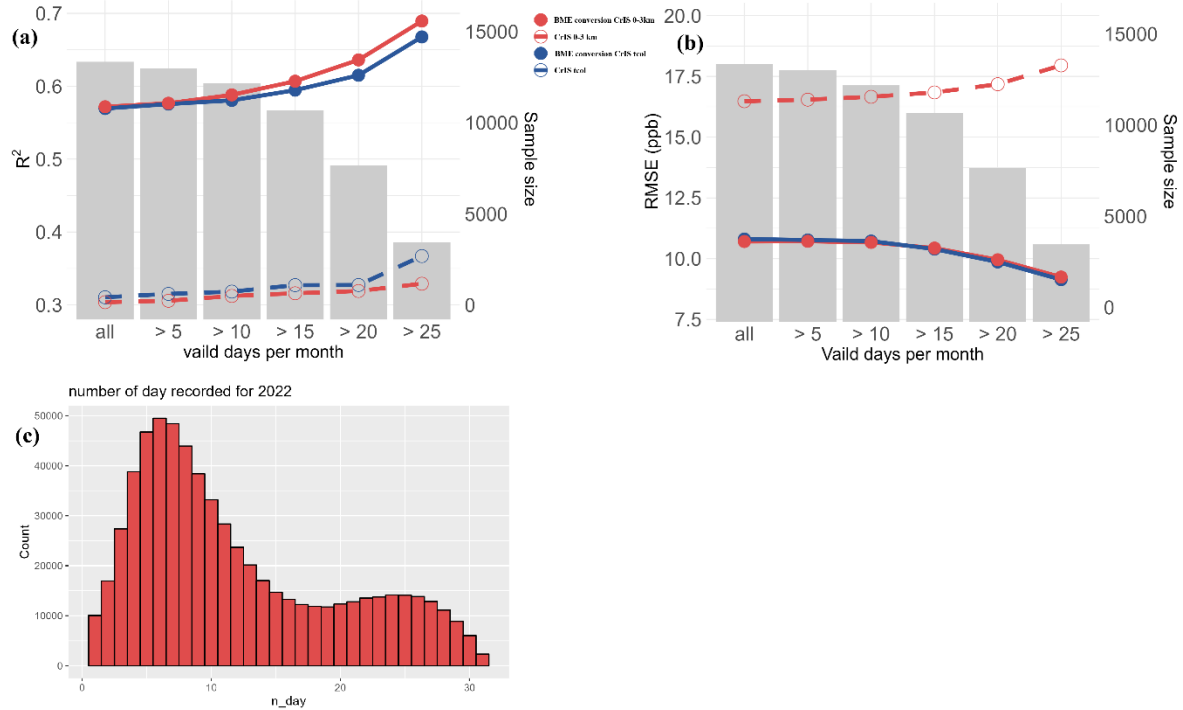

**Figure S3. CrIS performance across varying daily data densities. Evaluation of the BME-adjusted conversion method for CrIS 0–3 km ozone and CrIS tropospheric column ozone against TOAR-II monthly average DMA8 ozone observations (2022): (a) spatial correlation ( $R^2$ ) versus daily data density; (b) model bias (RMSE) versus daily data density; and (c) frequency of CrIS data point locations across different daily recording counts at a  $1^\circ \times 1^\circ$  resolution. Red solid line represents BME-adjusted surface ozone (from CrIS 0-3km), red dash line represents original satellite observation from CrIS 0-3km, blue solid line represents BME-adjusted surface ozone (from CrIS tropospheric column ozone), blue dash line represents original satellite observation from CrIS tropospheric column ozone.**

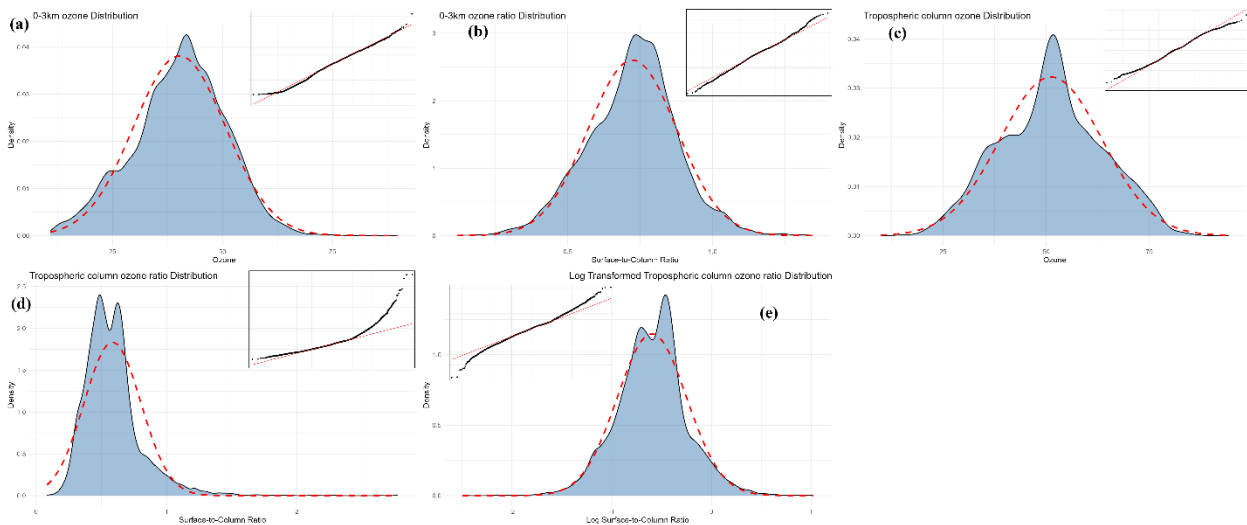

**Figure S4. Normality diagnostics for variables prior to BME: (a) 0–3 km ozone; (b) 0–3 km ozone ratio; (c) Tropospheric column ozone; (d) Tropospheric column ozone ratio; and (e) Log-transformed tropospheric column ozone ratio. The ratio is defined as the surface ozone divided by the column ozone.**

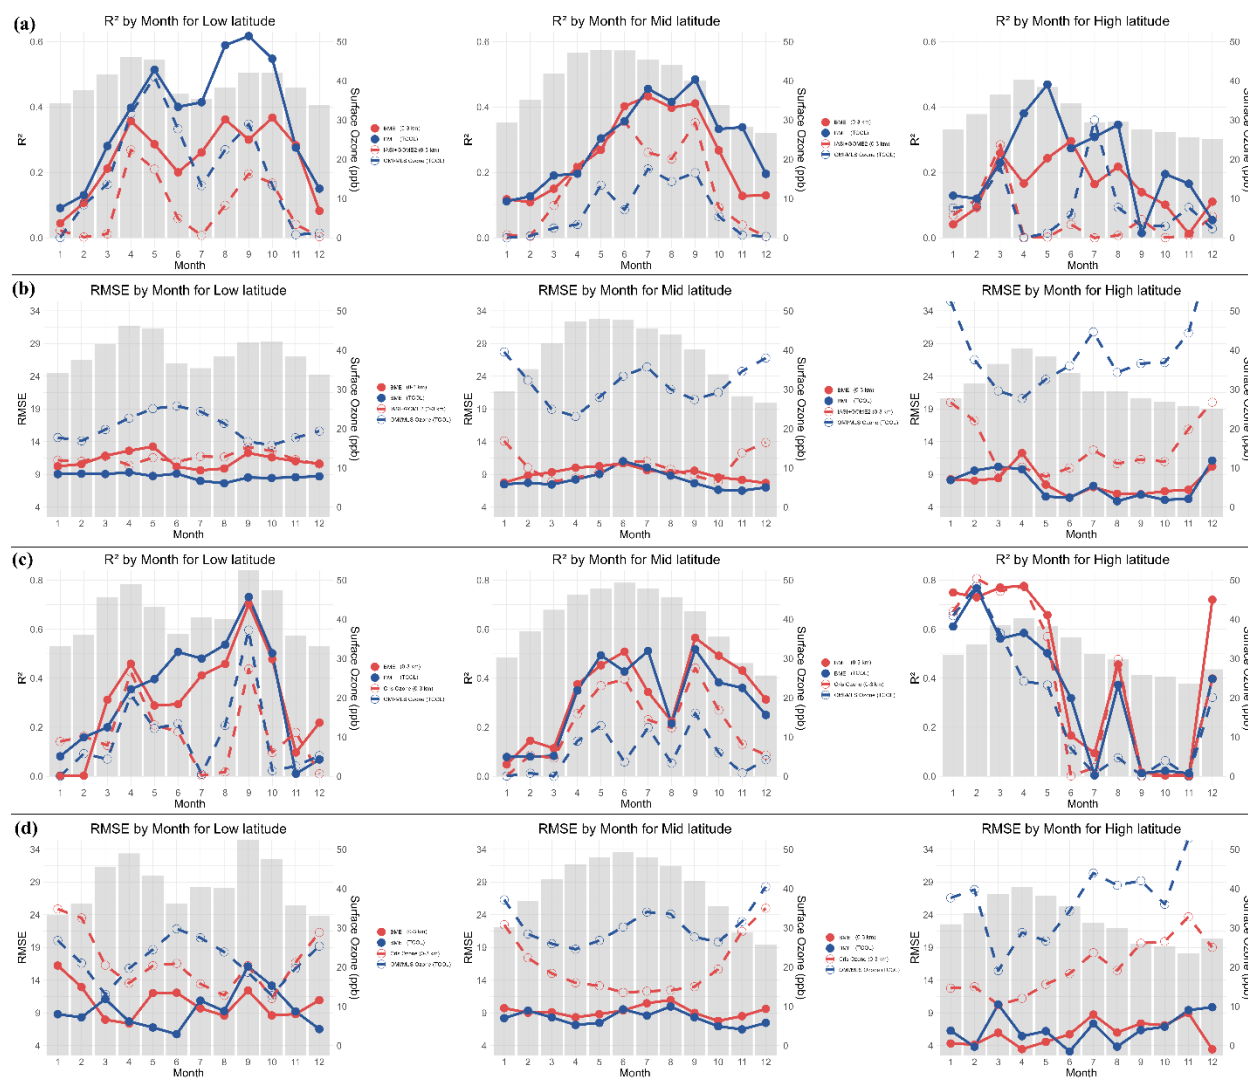

**Figure S5. Monthly  $R^2$  and RMSE of different latitude range for BME-adjusted surface ozone estimates. The evaluation includes data from IASI+GOME2 and OMI/MLS for the 2017–2020 period, and CrIS and OMI/MLS for 2022. (a) Monthly  $R^2$  of BME-adjusted surface ozone from IASI+GOME2 and OMI/MLS 2017–2020, (b) Monthly RMSE of BME-adjusted surface ozone from IASI+GOME2 and OMI/MLS 2017–2020, (c) Monthly  $R^2$  of BME-adjusted surface ozone from CrIS and OMI/MLS for 2022, (d) Monthly RMSE of BME-adjusted surface ozone from CrIS and OMI/MLS for 2022.**

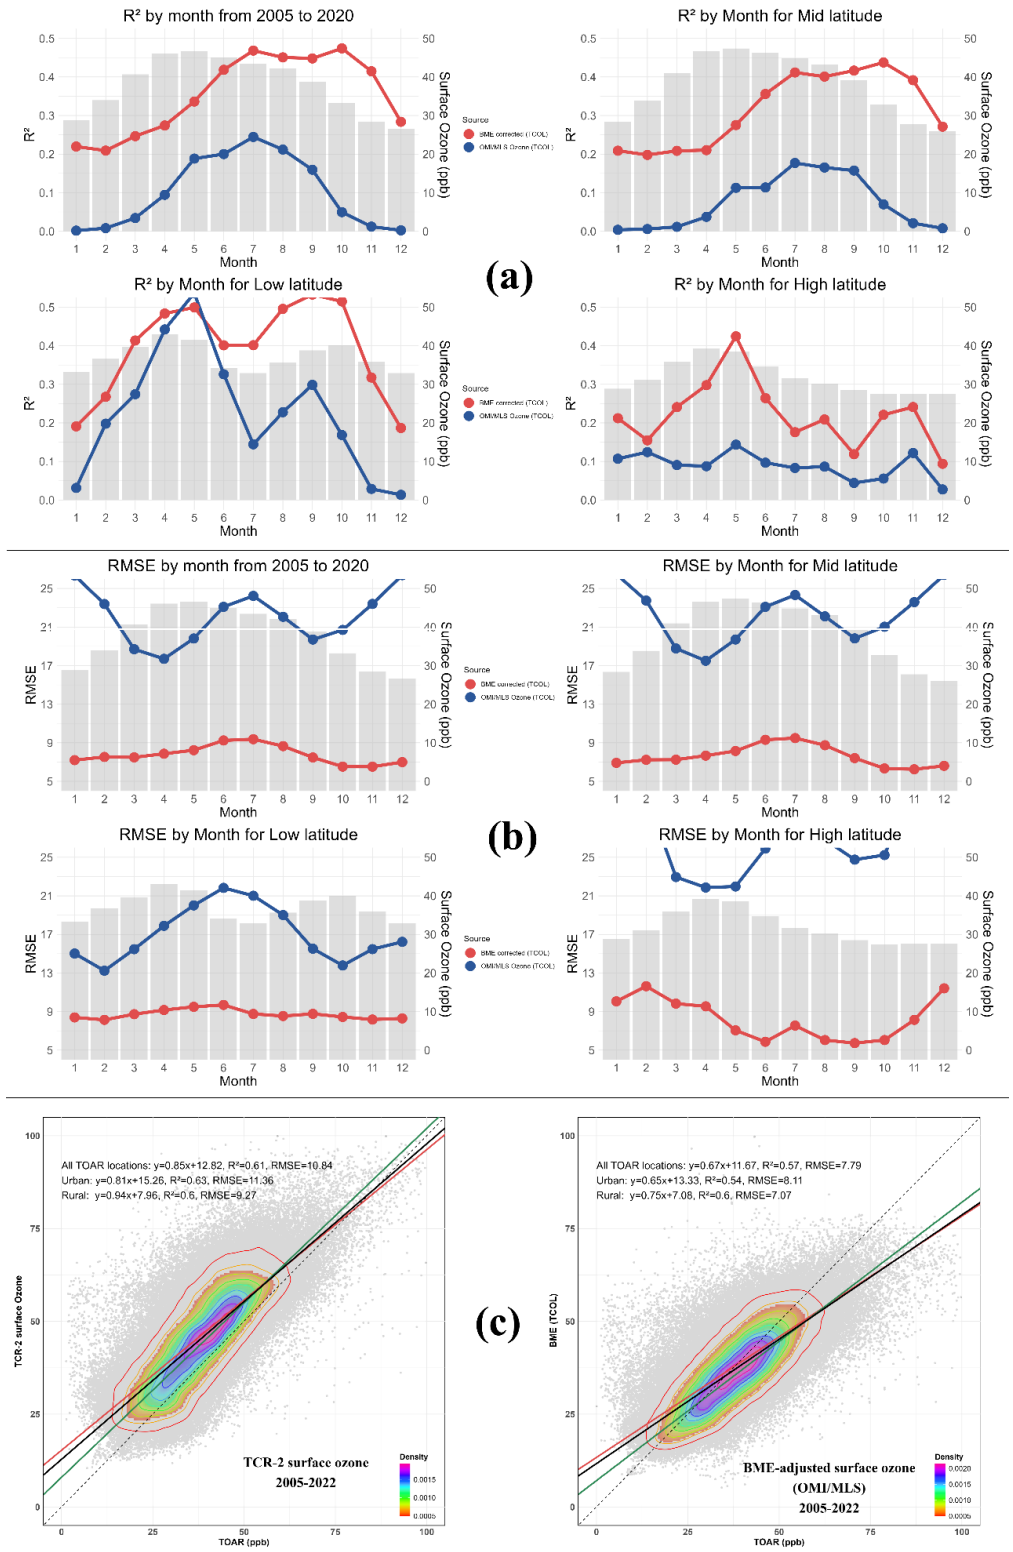

Figure S6. The evaluation is BME-adjusted surface ozone estimates from OMI/MLS for the 2005–2022 period. (a) Monthly R<sup>2</sup> of different latitude range for BME-adjusted surface ozone estimates. (b) Monthly RMSE of different latitude range for BME-adjusted surface ozone estimates. (c) OMI/MLS scatter plot with linear regression against TOAR-II.

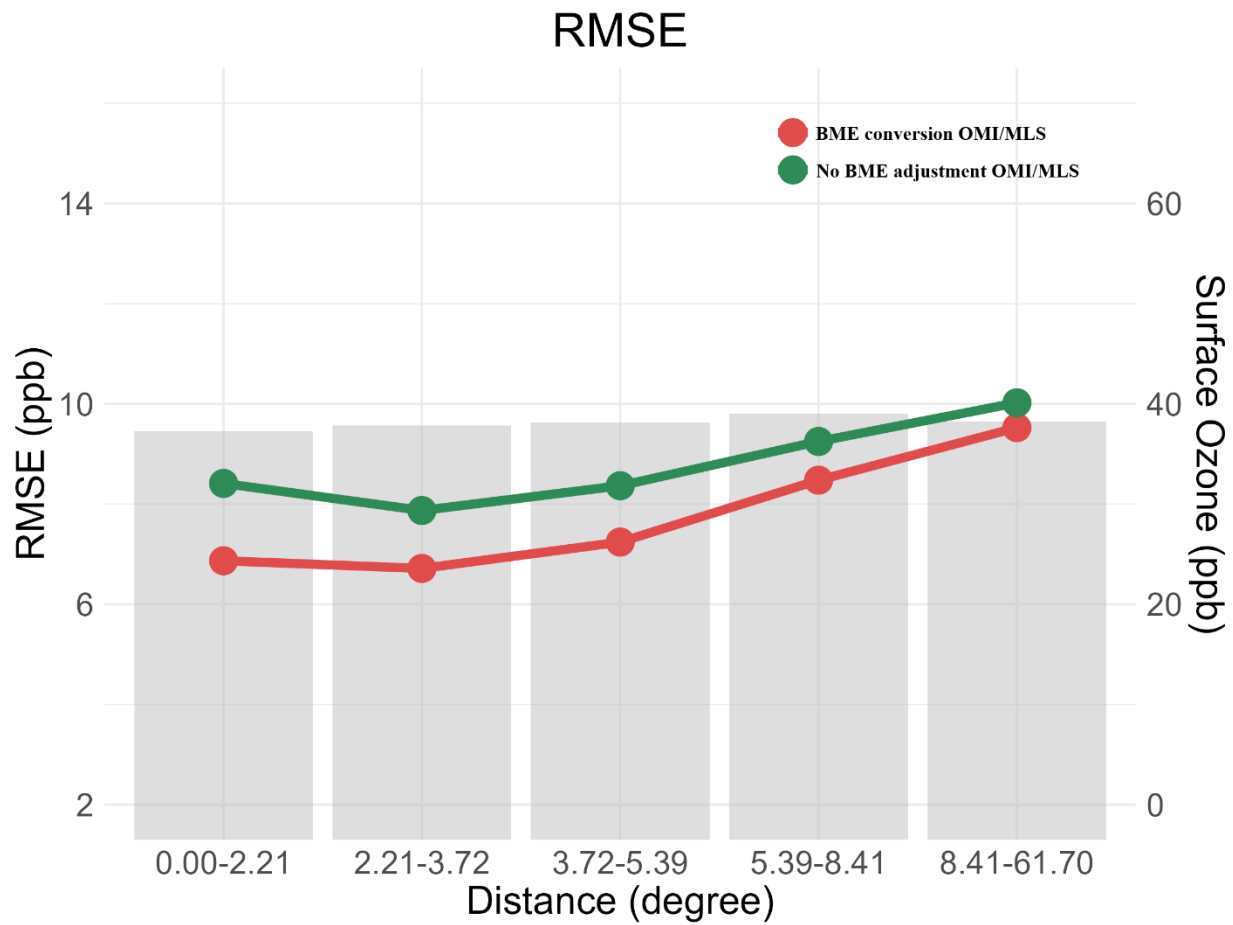

Figure S7. RMSE of BME-adjusted surface ozone from OMI/MLS data regarding the distance to the nearest vertical profile location from 2005-2022.

**Figure S8. Monthly spatial distributions of BME-adjusted surface ozone estimates and corresponding uncertainty maps. The panels illustrate monthly surface ozone concentrations and their associated estimation uncertainties for three representative years: (a) 2012 (based on OMI/MLS); (b) 2017 (based on IASI+GOME-2); and (c) 2022 (based on CrIS).**

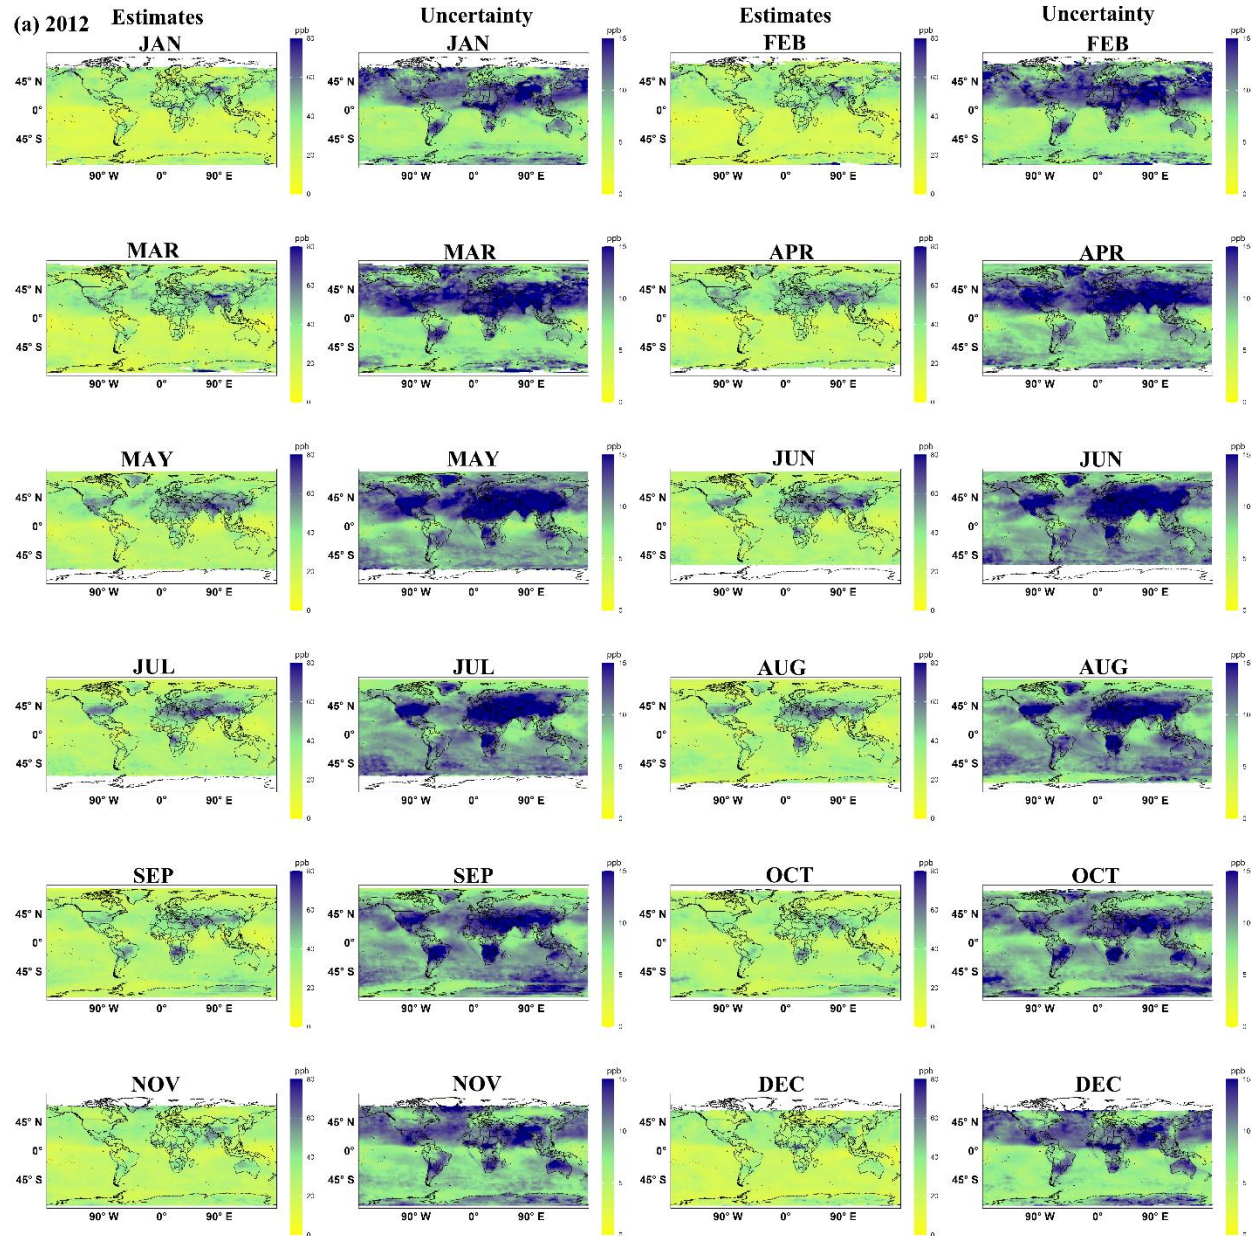

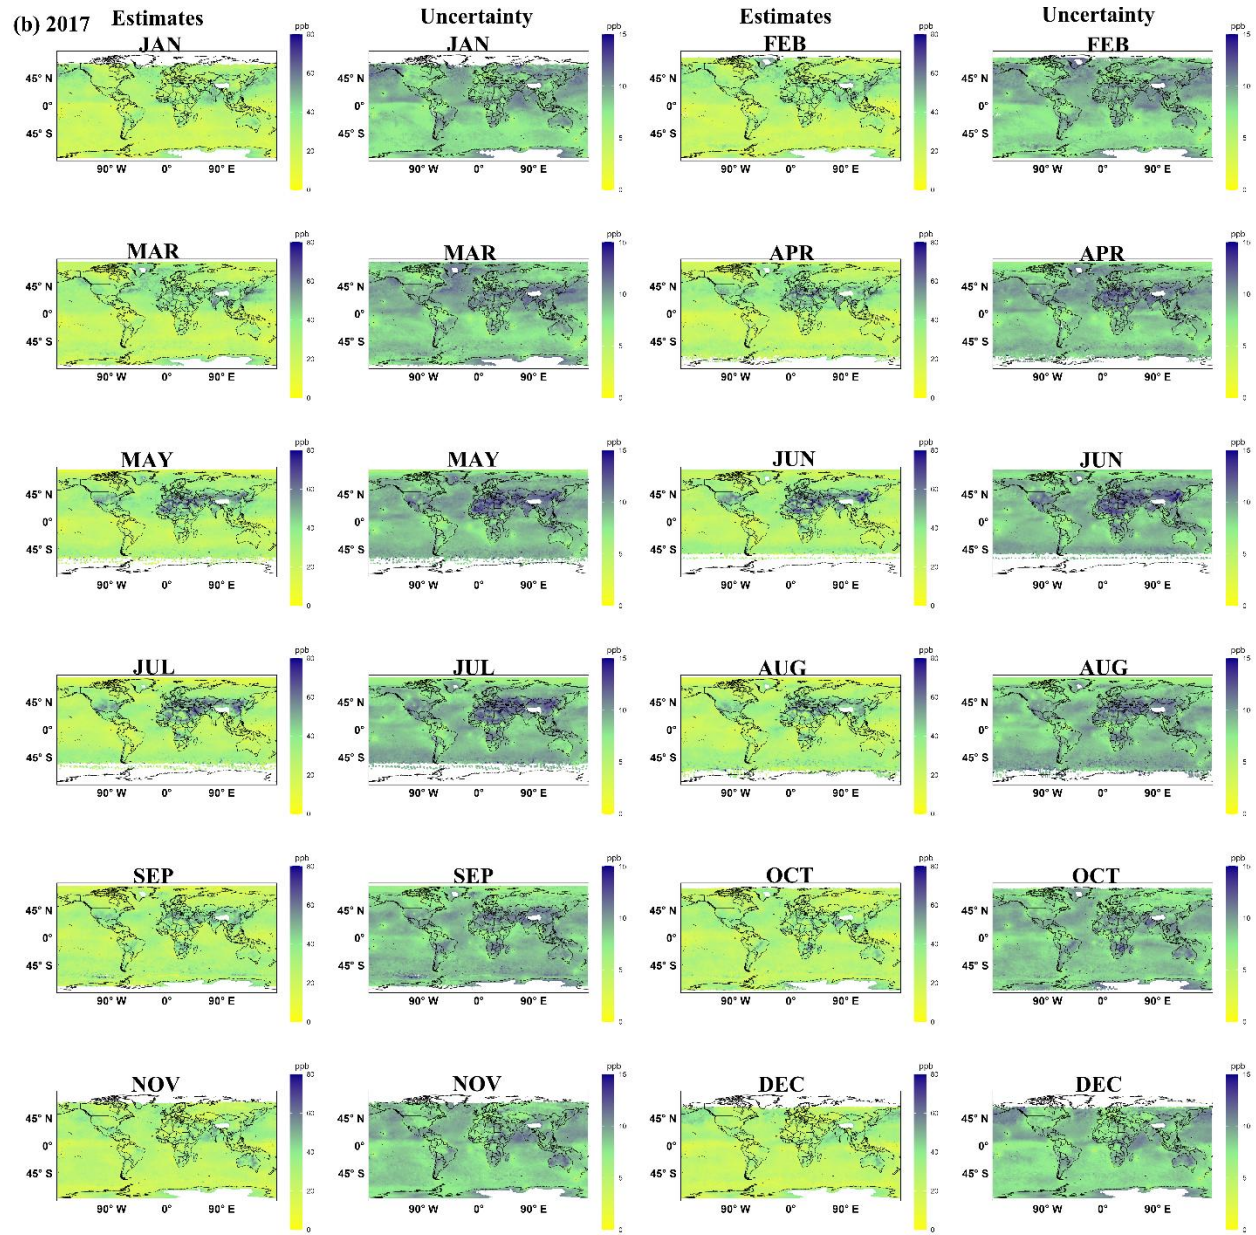

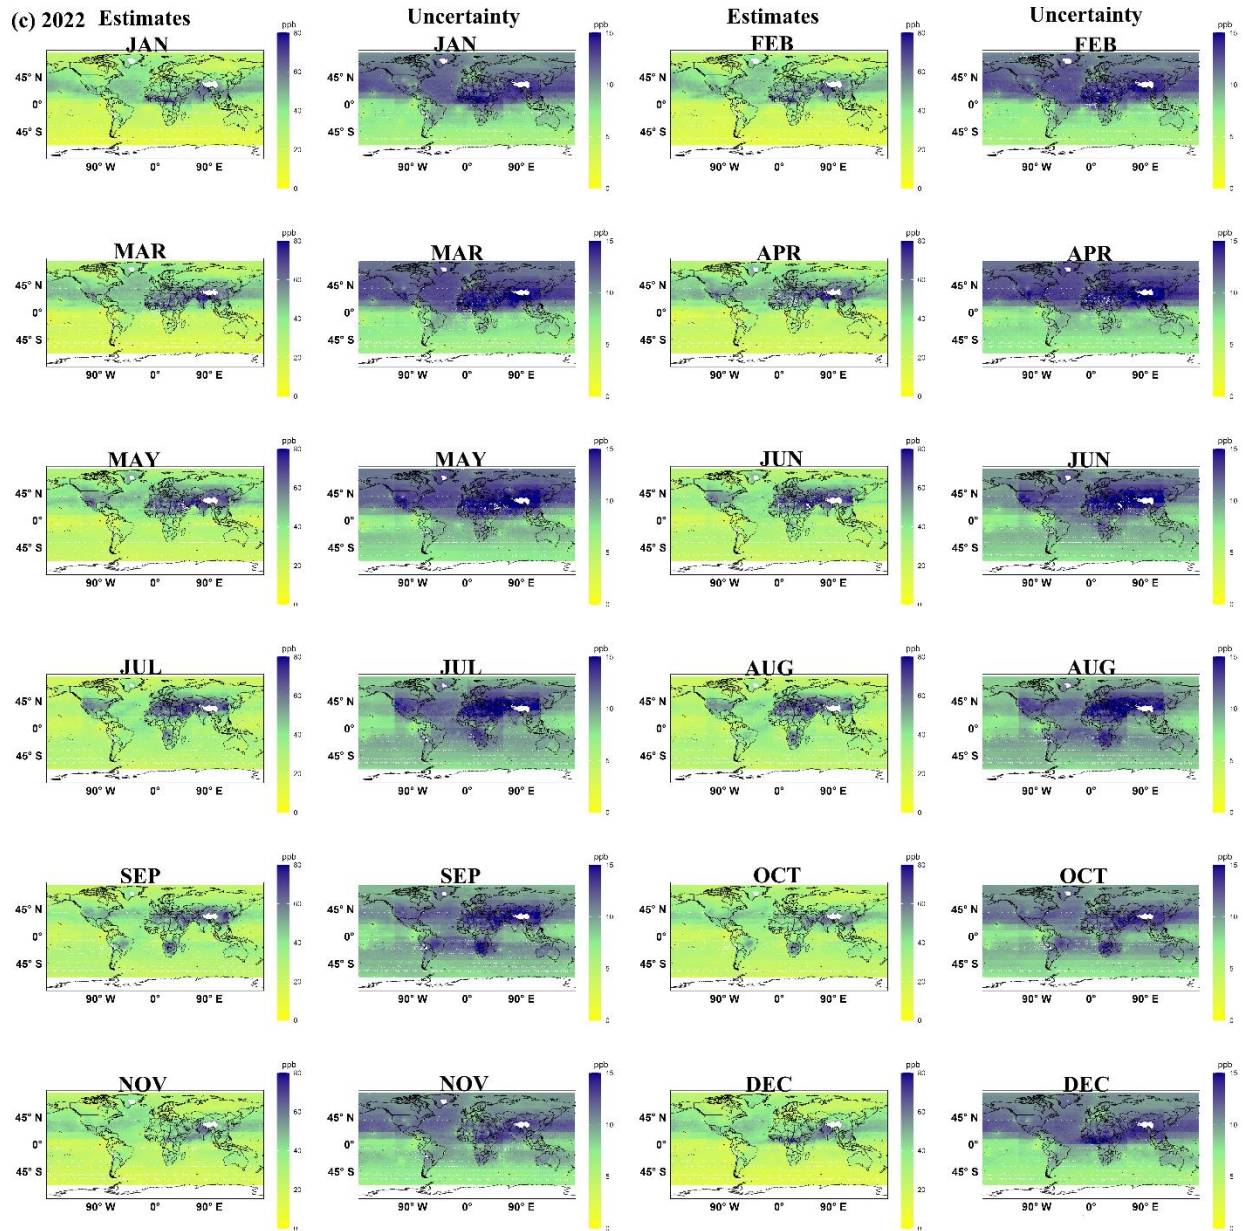

## Reference

- Boersma, K., Eskes, H., Richter, A., De Smedt, I., Lorente, A., Beirle, S., Van Geffen, J., Peters, E., Van Roozendaal, M., and Wagner, T.: QA4ECV NO<sub>2</sub> tropospheric and stratospheric vertical column data from OMI (Version 1.1)[Data set], Royal Netherlands Meteorological Institute (KNMI), 2017.
- Boersma, K. F., Eskes, H. J., and Brinksma, E. J.: Error analysis for tropospheric NO<sub>2</sub> retrieval from space, *Journal of Geophysical Research: Atmospheres*, 109, <https://doi.org/10.1029/2003JD003962>, 2004.
- Boersma, K. F., Eskes, H. J., Dirksen, R. J., van der A, R. J., Veefkind, J. P., Stammes, P., Huijnen, V., Kleipool, Q. L., Sneep, M., Claas, J., Leitão, J., Richter, A., Zhou, Y., and Brunner, D.: An improved tropospheric NO<sub>2</sub> column retrieval algorithm for the Ozone Monitoring Instrument, *Atmos. Meas. Tech.*, 4, 1905-1928, 10.5194/amt-4-1905-2011, 2011.
- Bowman, K. W., Rodgers, C. D., Kulawik, S. S., Worden, J., Sarkissian, E., Osterman, G., Steck, T., Ming, L., Eldering, A., Shephard, M., Worden, H., Lampel, M., Clough, S., Brown, P., Rinsland, C., Gunson, M., and Beer, R.: Tropospheric emission spectrometer: retrieval method and error analysis, *IEEE Transactions on Geoscience and Remote Sensing*, 44, 1297-1307, 10.1109/TGRS.2006.871234, 2006.
- Deeter, M. N., Edwards, D. P., Francis, G. L., Gille, J. C., Martínez-Alonso, S., Worden, H. M., and Sweeney, C.: A climate-scale satellite record for carbon monoxide: the MOPITT Version 7 product, *Atmos. Meas. Tech.*, 10, 2533-2555, 10.5194/amt-10-2533-2017, 2017.
- Deeter, M. N., Martínez-Alonso, S., Edwards, D. P., Emmons, L. K., Gille, J. C., Worden, H. M., Pittman, J. V., Daube, B. C., and Wofsy, S. C.: Validation of MOPITT Version 5 thermal-infrared, near-infrared, and multispectral carbon monoxide profile retrievals for 2000–2011, *Journal of Geophysical Research: Atmospheres*, 118, 6710-6725, <https://doi.org/10.1002/jgrd.50272>, 2013.
- Herman, R. and Kulawik, S.: Tropospheric Emission Spectrometer TES Level 2 (L2) Data User's Guide, D-38042, version 6.0, Jet Propulsion Laboratory, California Institute of Technology, Pasadena, CA, available at: <http://tes.jpl.nasa.gov/documents> (last access: 30 June 2014), 2013.
- KOFFI, L. B., DENTENER, F., JANSSENS-MAENHOUT, G., GUIZZARDI, D., CRIPPA, M., DIEHL, T., GALMARINI, S., and SOLAZZO, E.: Hemispheric Transport of Air Pollution (HTAP): Specification of the HTAP2 experiments: Ensuring harmonized modelling, 2016.
- Krotkov, N. A., McLinden, C. A., Li, C., Lamsal, L. N., Celarier, E. A., Marchenko, S. V., Swartz, W. H., Bucsela, E. J., Joiner, J., and Duncan, B. N.: Aura OMI observations of regional SO<sub>2</sub> and NO<sub>2</sub> pollution changes from 2005 to 2015, *Atmospheric Chemistry and Physics*, 16, 4605-4629, 2016.
- Li, C., Joiner, J., Krotkov, N. A., and Bhartia, P. K.: A fast and sensitive new satellite SO<sub>2</sub> retrieval algorithm based on principal component analysis: Application to the ozone monitoring instrument, *Geophysical Research Letters*, 40, 6314-6318, <https://doi.org/10.1002/2013GL058134>, 2013.

Livesey, N., Read, W., Wagner, P., Froidevaux, L., Lambert, A., Manney, G., Valle, L., Pumphrey, H., Santee, M., and Schwartz, M.: Version 4.2 x level 2 data quality and description document, JPL D-33509 Rev, 2017.
